# Supplementary material
Source: publisher figshare collection journal article supplement (https://acs.figshare.com/ndownloader/files/3927547)

## Supporting Information

### Synthesis of 1,5-Dideoxy-1,5-Iminoribitol-*C*-Glycosides Through a Nitron-Olefin Cycloaddition Domino Strategy: Identification of Pharmacological Chaperones of Mutant Human Lysosomal $\beta$ -Galactosidase

Aloysius Siriwardena,<sup>□\*</sup> Dhiraj P. Sonawane,<sup>†</sup> Omprakash P. Bande,<sup>□</sup> Pramod R. Markad,<sup>†</sup>  
Sayuri Yonekawa,<sup>⊥</sup> Michael B. Tropak,<sup>⊥\*</sup> Sougata Ghosh,<sup>‡</sup> Balu A. Chopade,<sup>‡</sup> Don J.  
Mahuran<sup>⊥</sup>, Dilip D. Dhavale<sup>†\*</sup>

<sup>†</sup> *Department of Chemistry, Garware Research Centre, and <sup>‡</sup> Institute of Bioinformatics and Biotechnology, University of Pune, Pune - 411 007, India*

<sup>□</sup> *Laboratoire de Glycochimie, des Antimicrobiens et des Agroressources FRE 3517 CNRS, Université de Picardie Jules Verne, Amiens 80039, France.*

<sup>⊥</sup> *Programme in Genetics and Genome Biology, Sickkids, Toronto, Ontario, Canada.*

\* [ddd@chem.unipune.ac.in](mailto:ddd@chem.unipune.ac.in); [aloysius.siriwardena@u-picardie.fr](mailto:aloysius.siriwardena@u-picardie.fr); [mb.tropak@utoronto.ca](mailto:mb.tropak@utoronto.ca)

#### Table Of Content

|                                                                                                          |        |
|----------------------------------------------------------------------------------------------------------|--------|
| 1) <sup>1</sup> H and <sup>13</sup> C spectra of new compounds <b>10a-e</b> and <b>7a-e</b> , <b>8</b> . | S2-S24 |
| 2) Decoupled spectra of compound <b>10a</b> .                                                            | S-25   |
| 3) HRMS spectra <b>10a-e</b> and <b>7a-e</b> , <b>8</b> .                                                | S-26   |
| 4) Plot of enzyme activity vs. inhibitor concentration                                                   | S-32   |

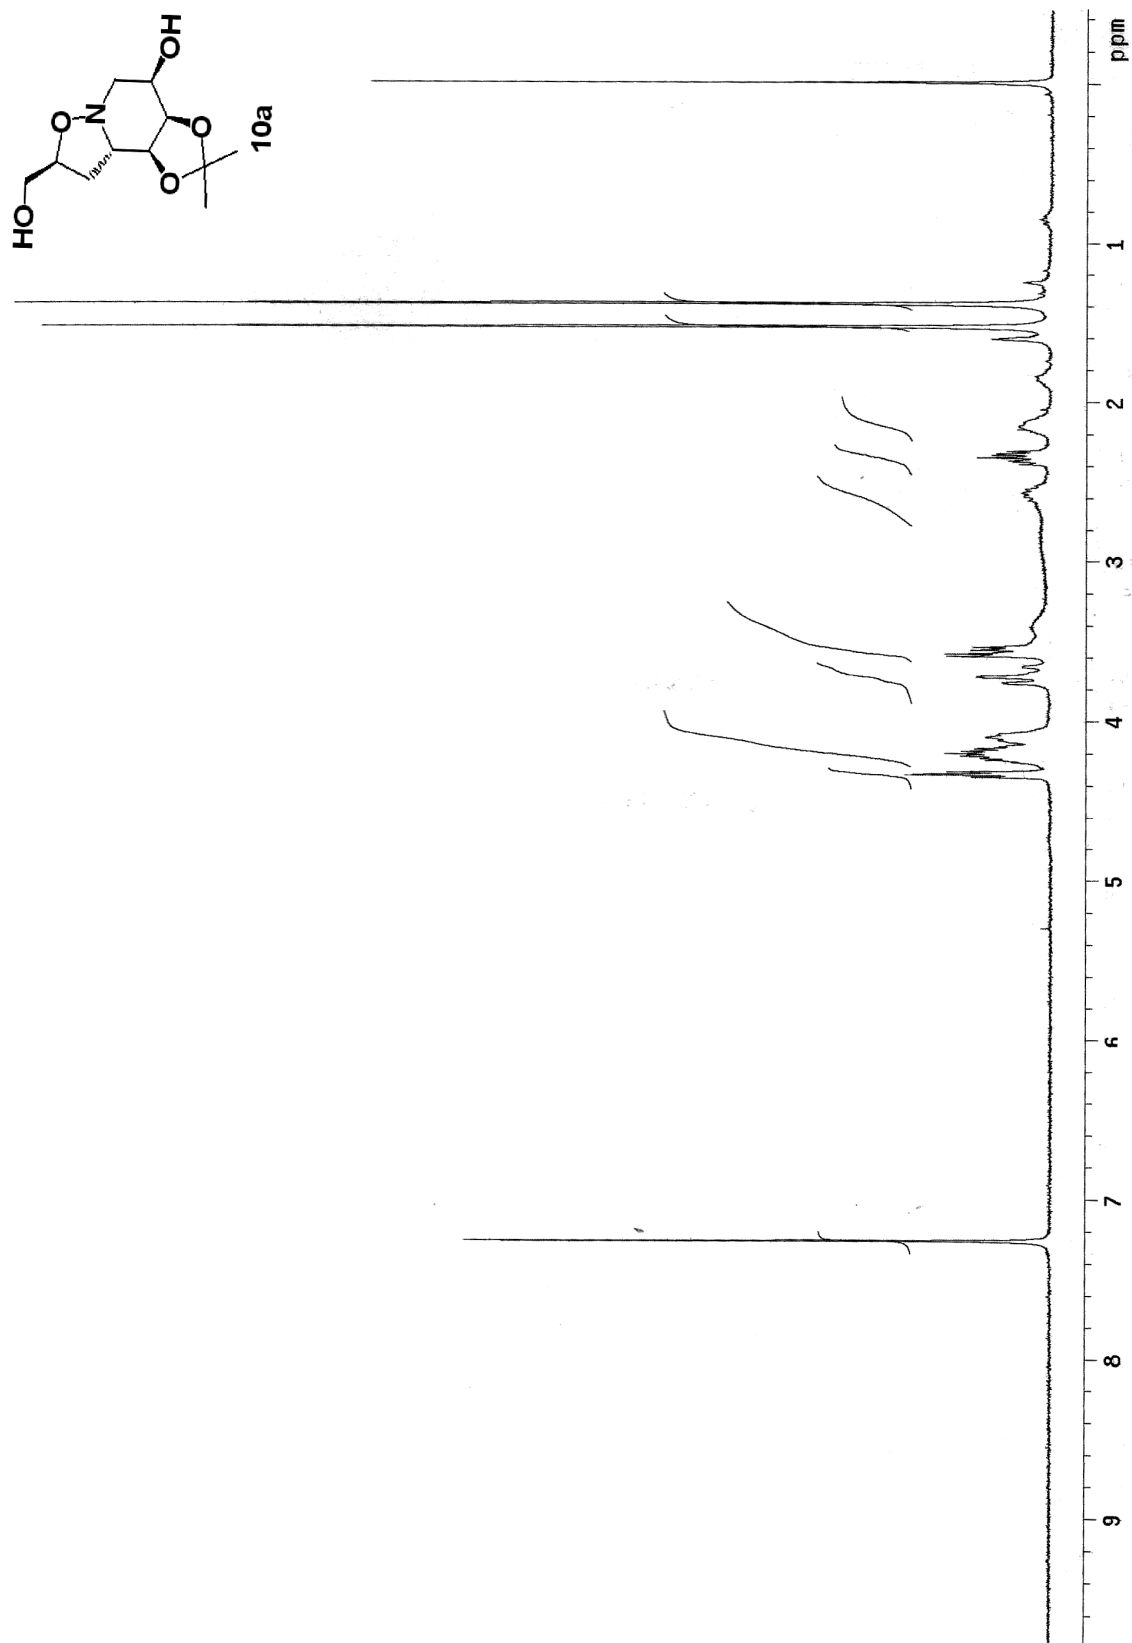

Figure 1S:  $^1\text{H}$  (300 MHz,  $\text{CDCl}_3$ ) Spectrum of compound 10a

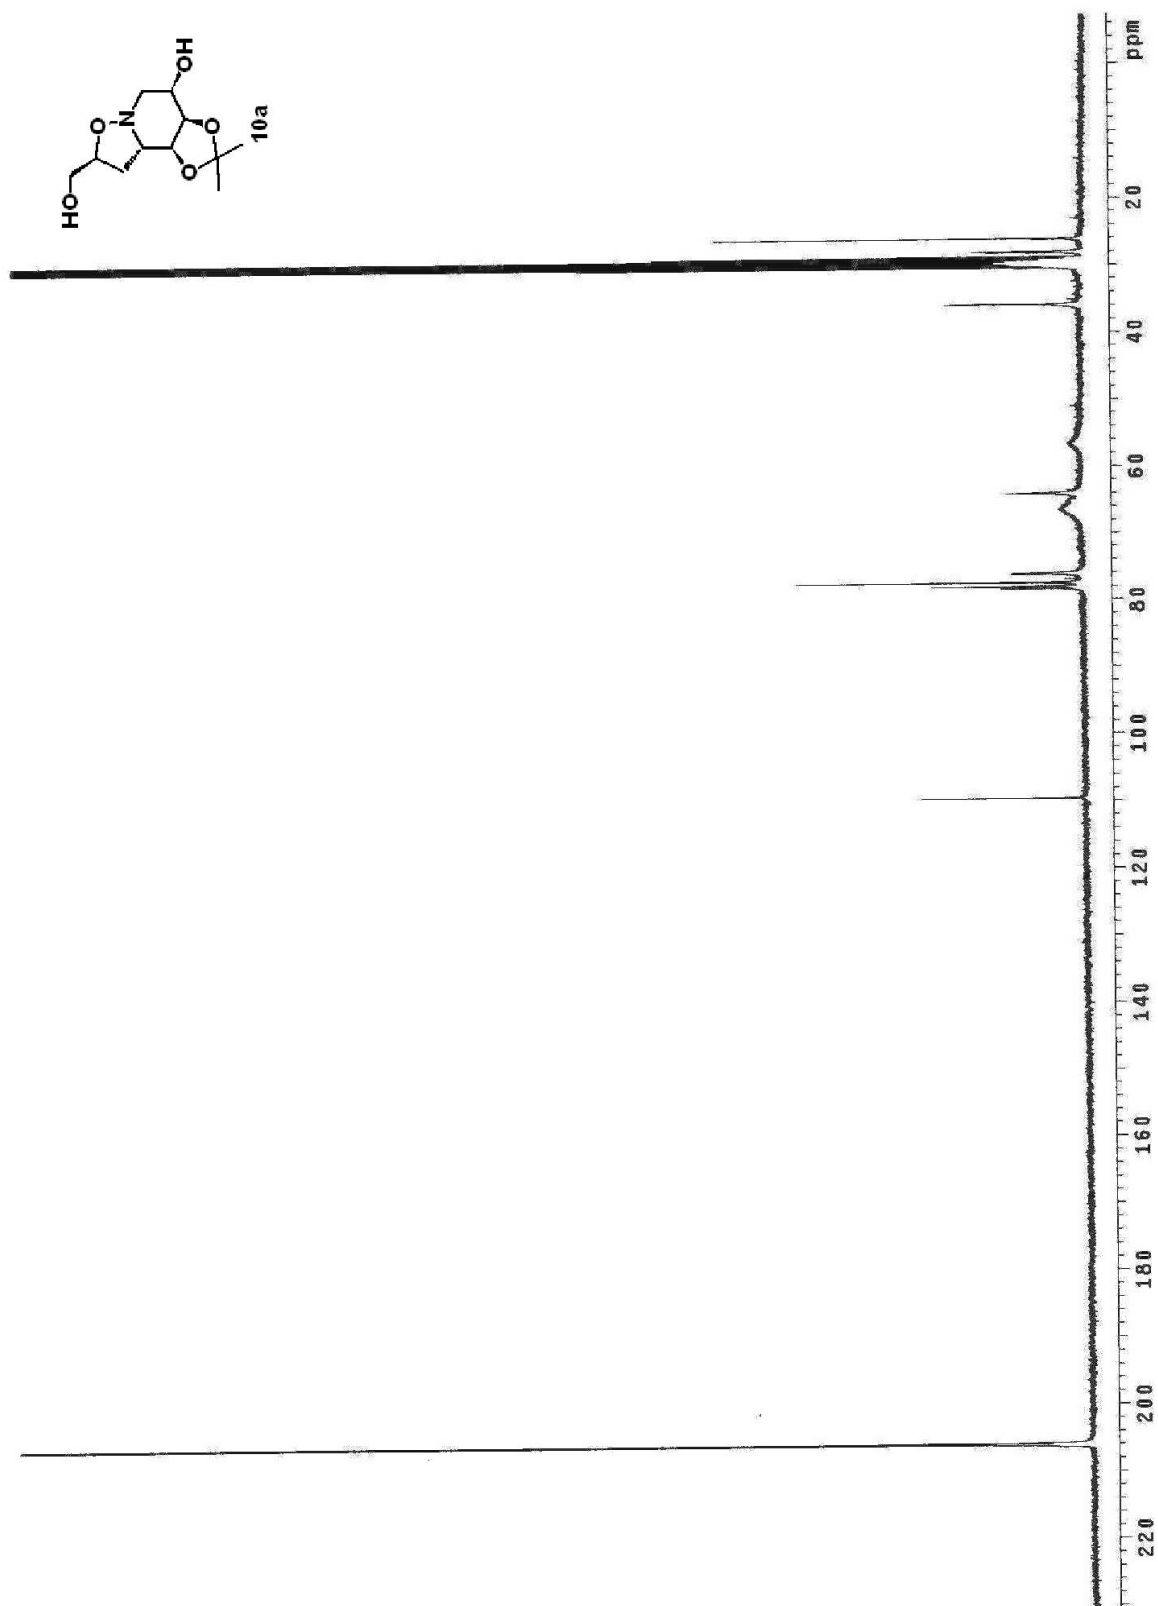

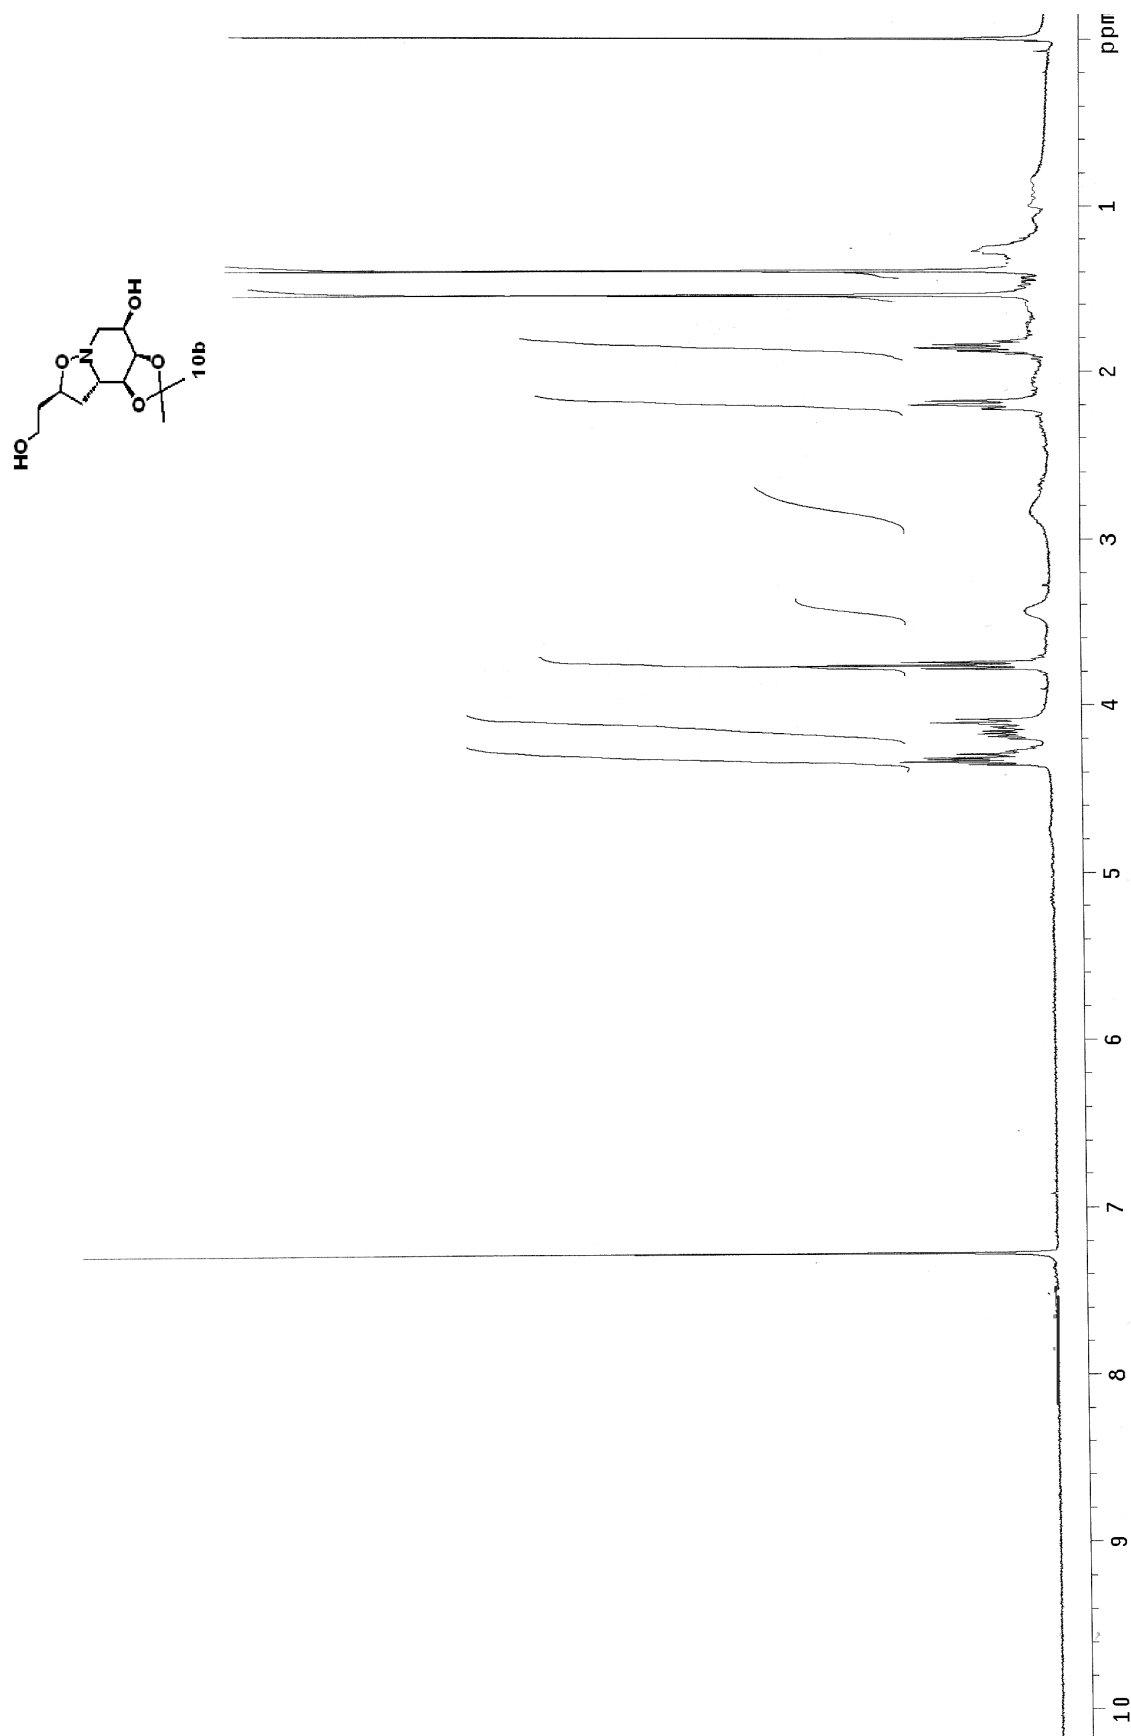

Figure 3S:  $^1\text{H}$  (300 MHz,  $\text{CDCl}_3$ ) Spectrum of compound 10b

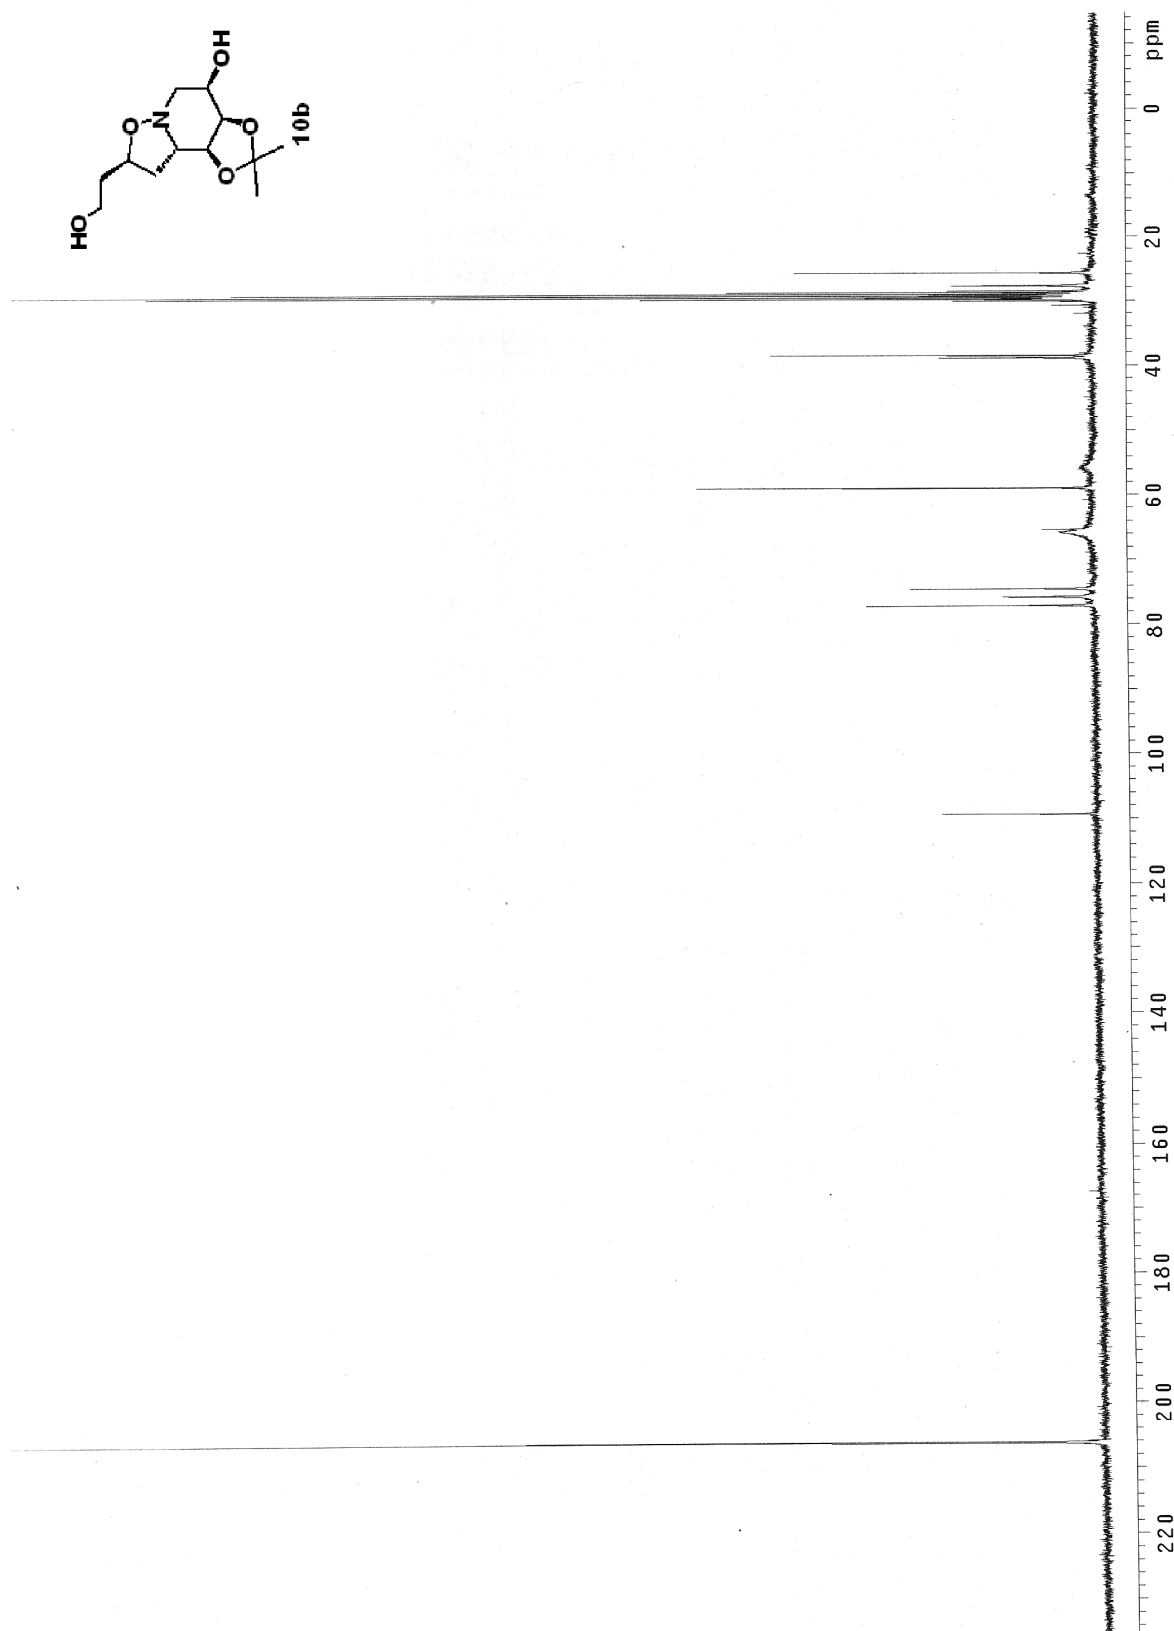

Figure 4S:  $^{13}\text{C}$  (75 MHz, Acetone- $\text{d}_6$ ) Spectrum of compound 10b

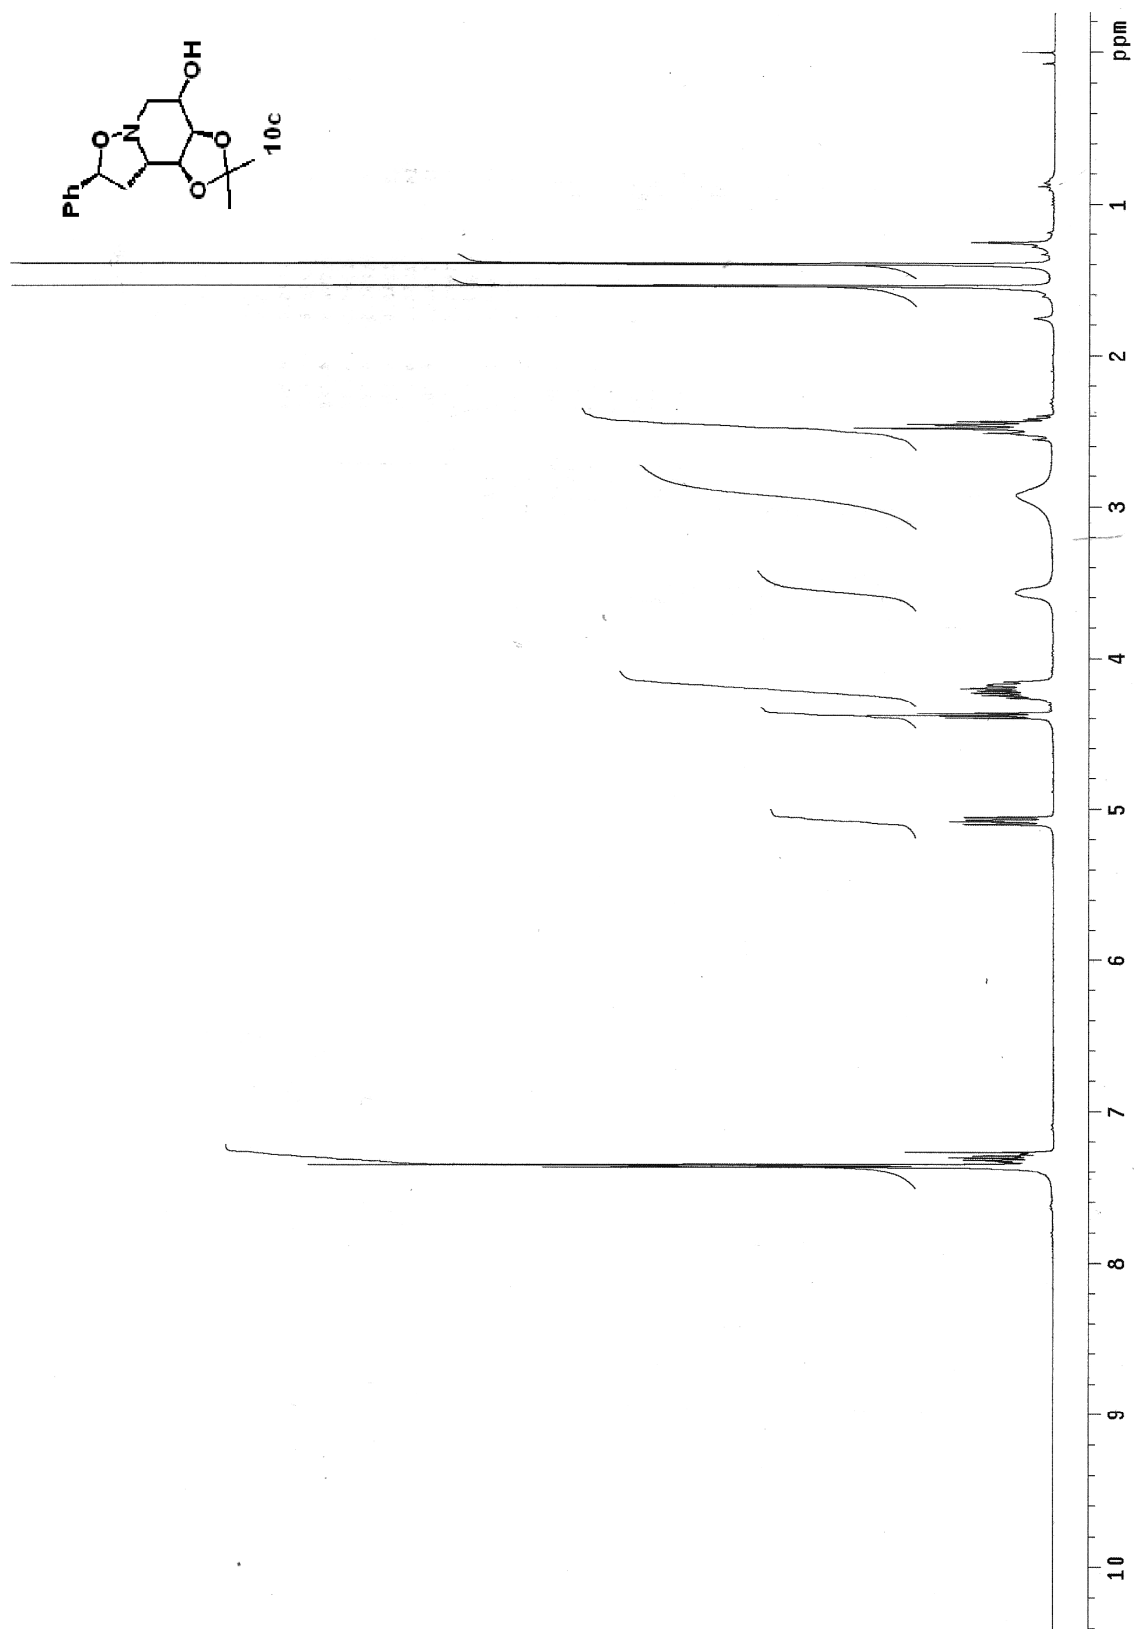

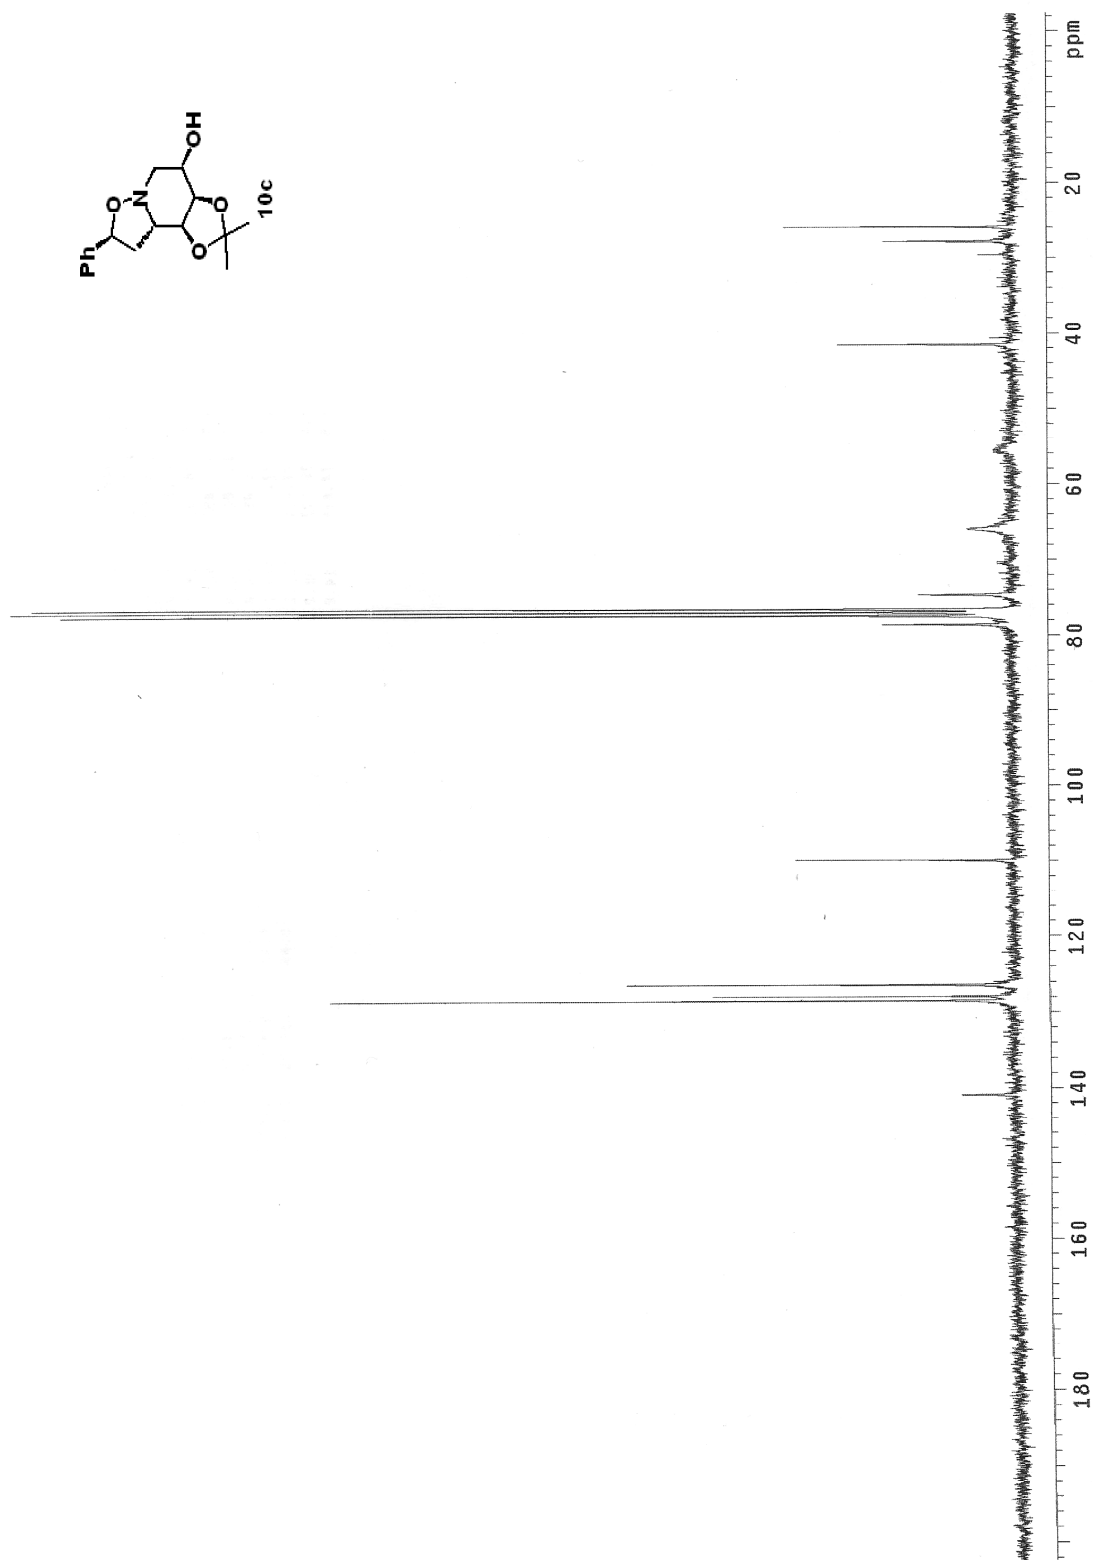

Figure 6S:  $^{13}\text{C}$  (75 MHz,  $\text{CDCl}_3$ ) Spectrum of compound 10c

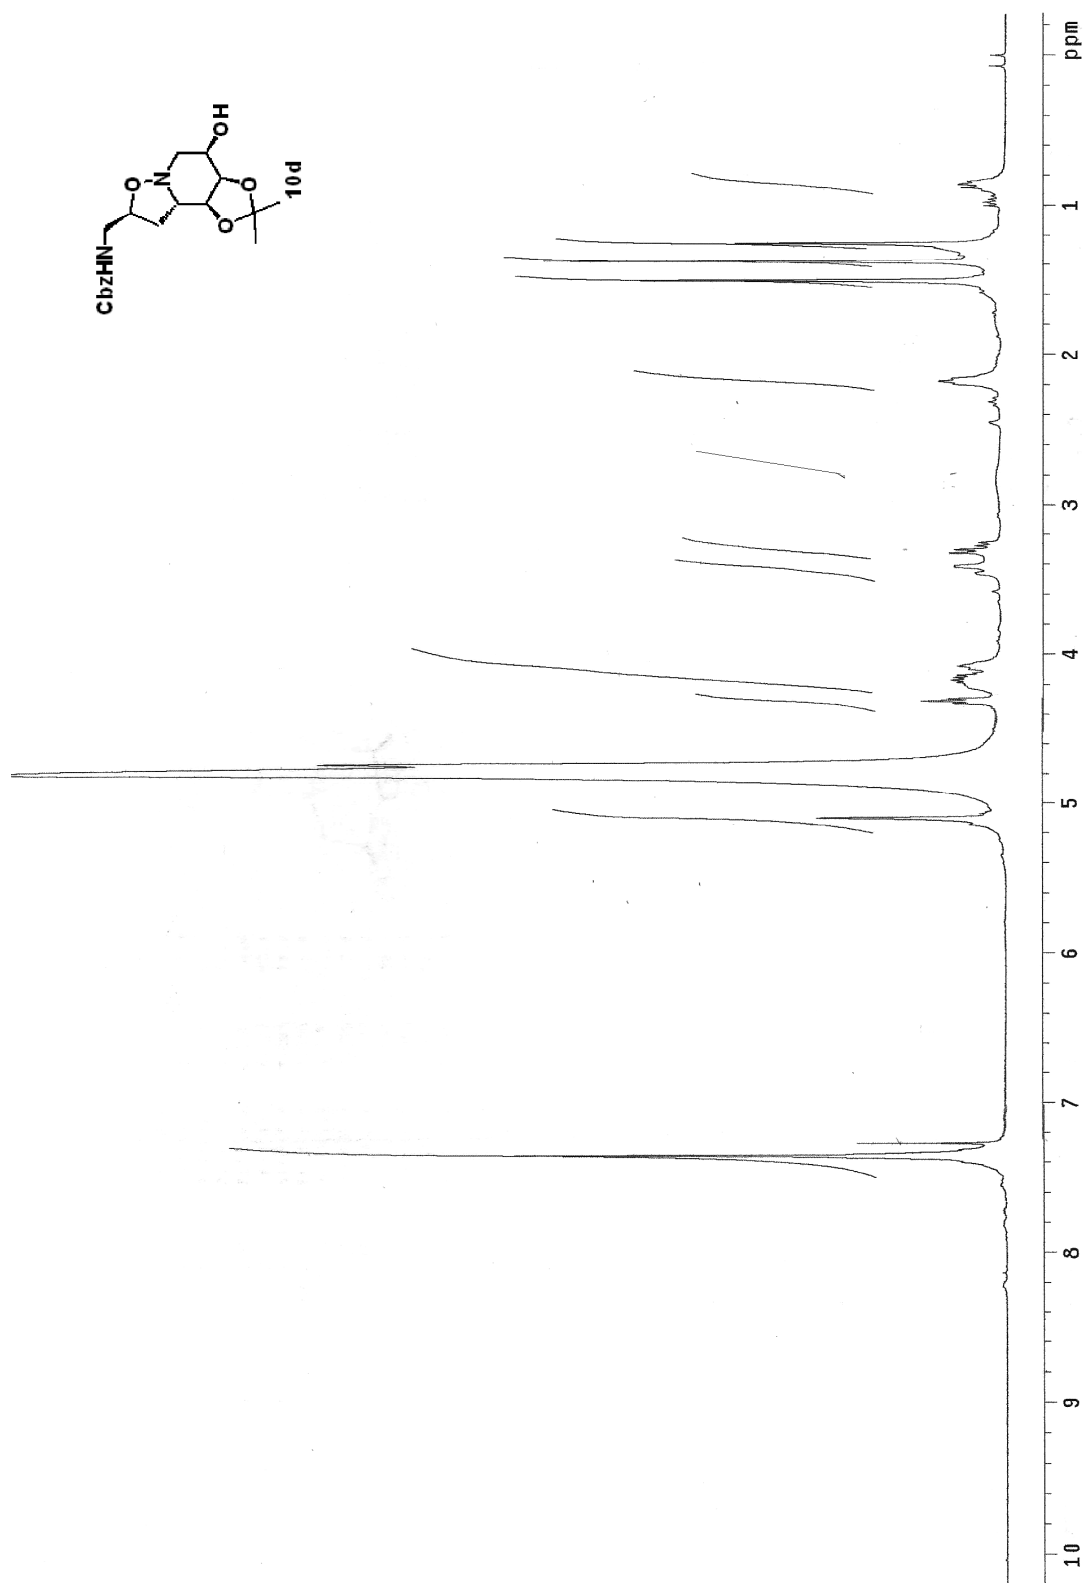

Figure 7S:  $^1\text{H}$  (300 MHz,  $\text{CDCl}_3$ ) Spectrum of compound 10d



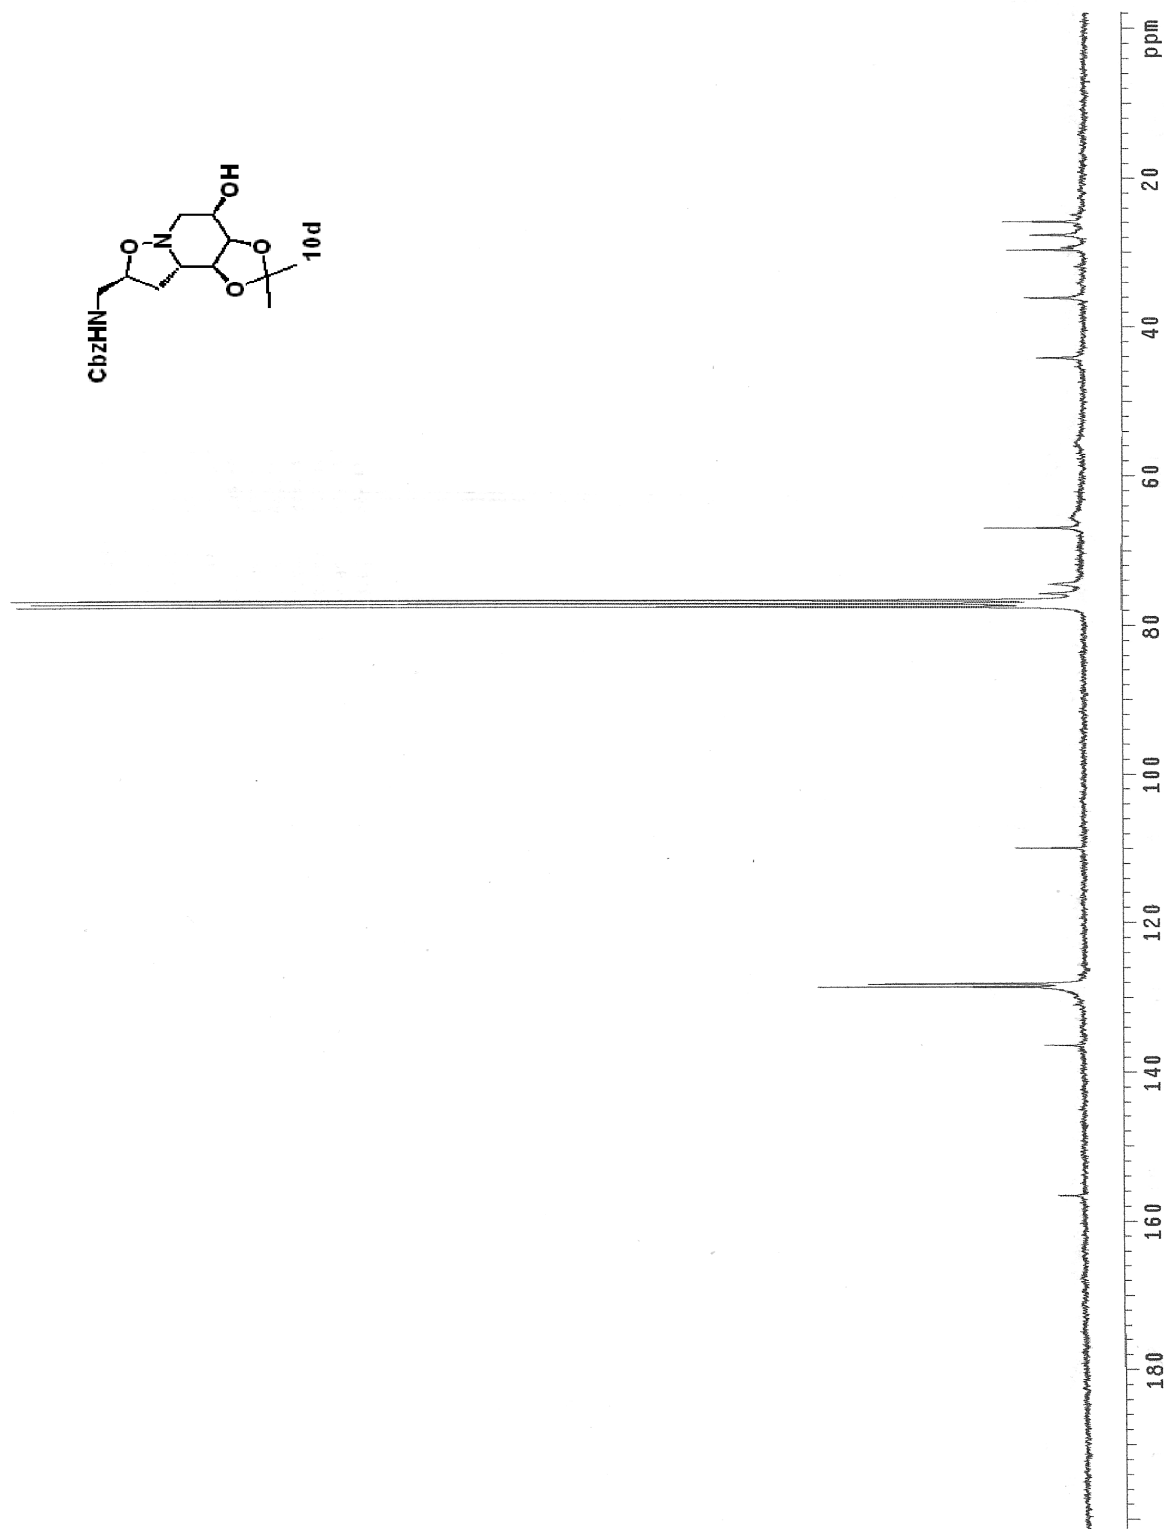

Figure 8S:  $^{13}\text{C}$  (75 MHz,  $\text{CDCl}_3$ ) Spectrum of compound 10d

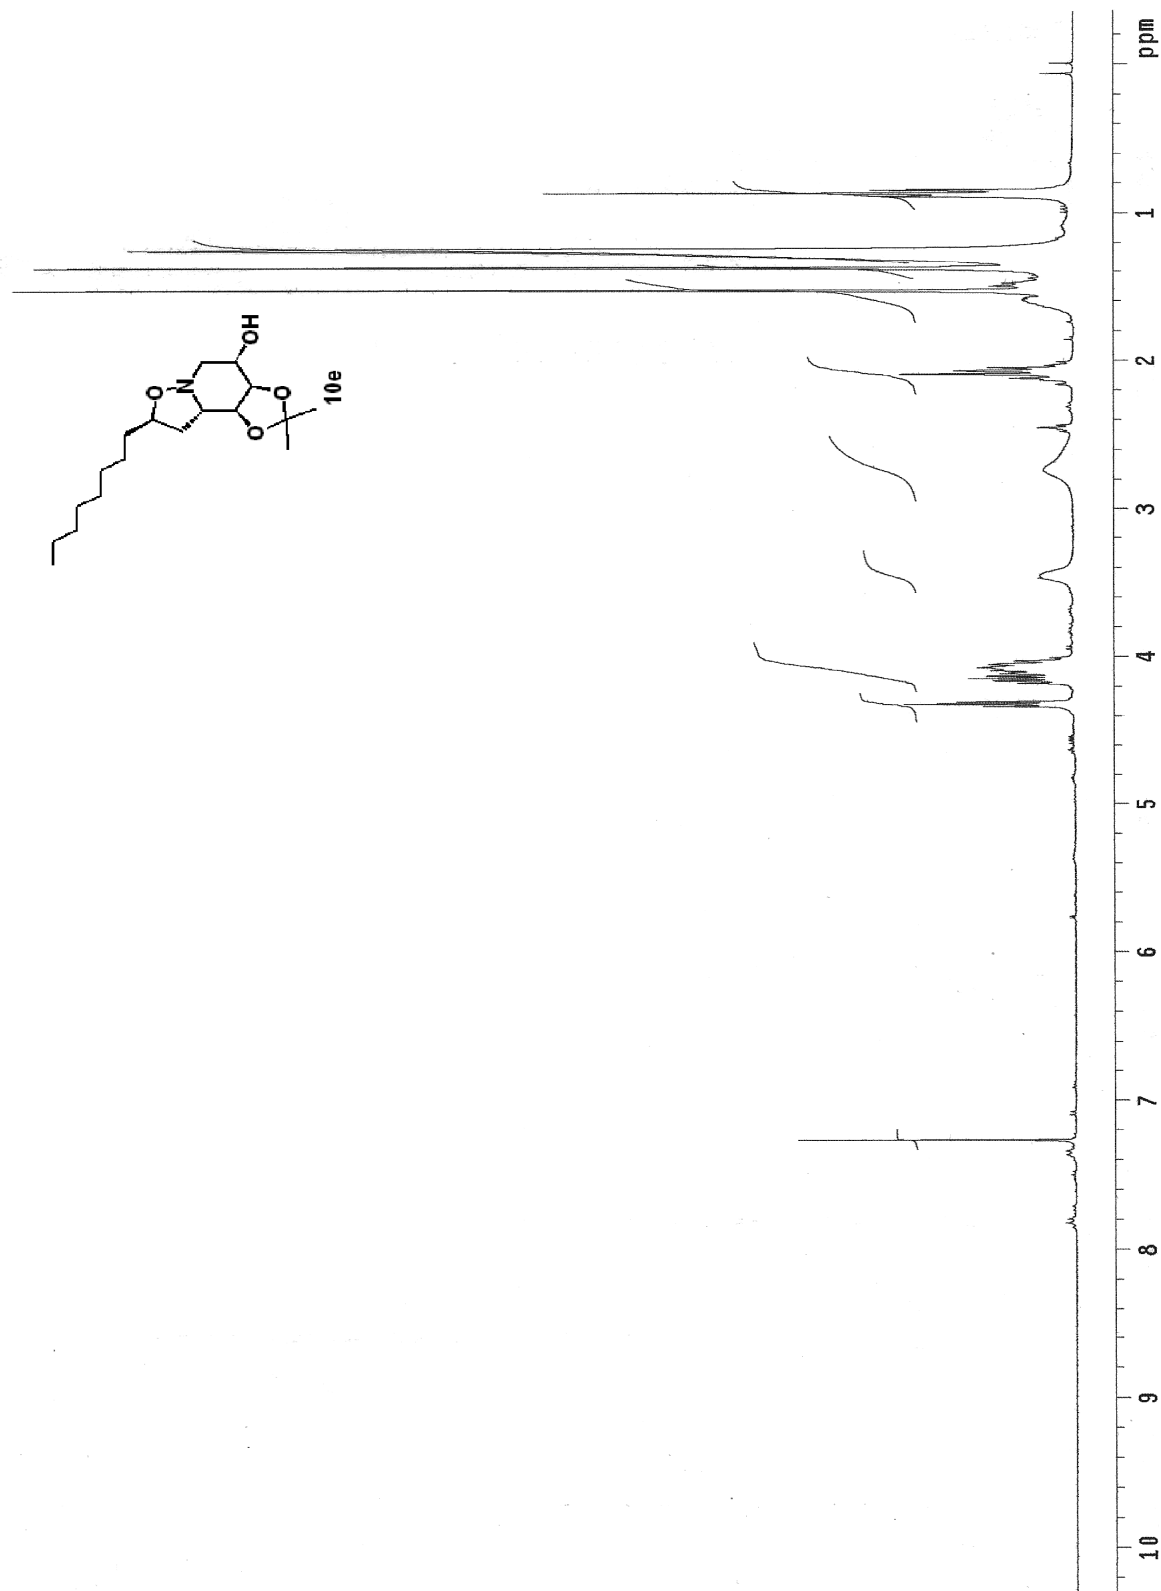

Figure 9S:  $^1\text{H}$  (300 MHz,  $\text{CDCl}_3$ ) Spectrum of compound 10e

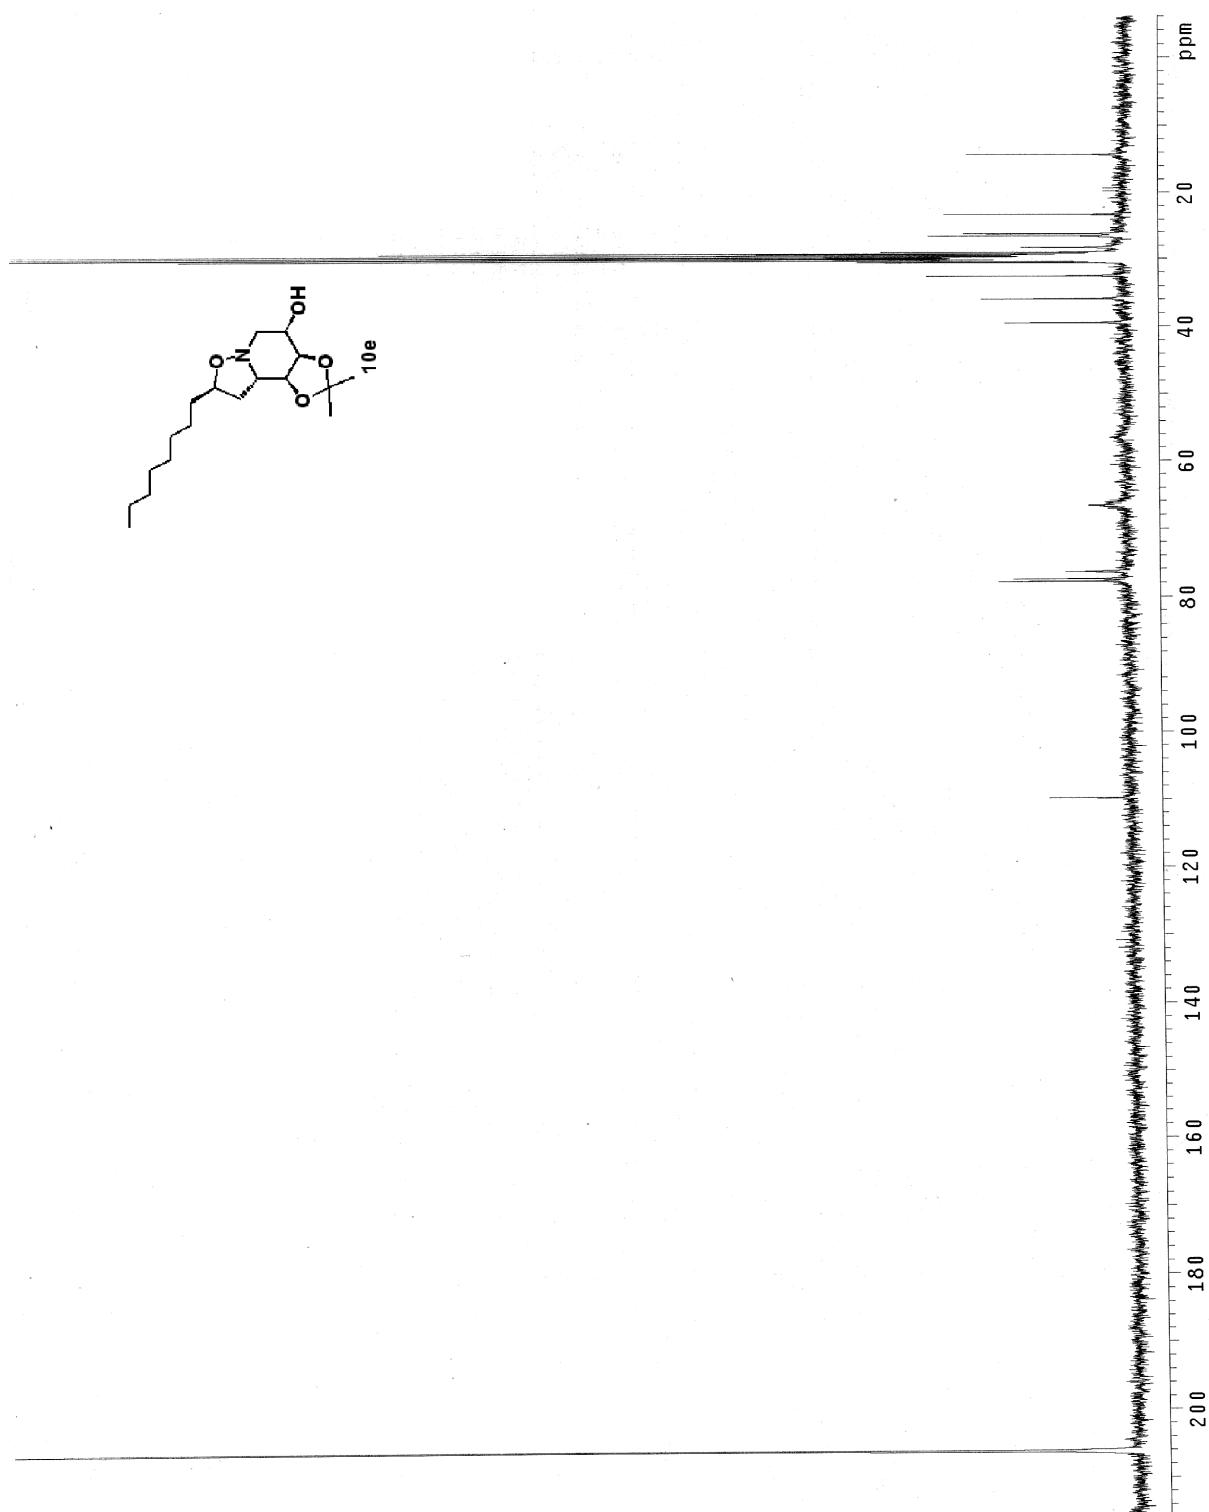

Figure 10S:  $^{13}\text{C}$  (75 MHz, Acetone- $\text{d}_6$ ) Spectrum of compound 10e

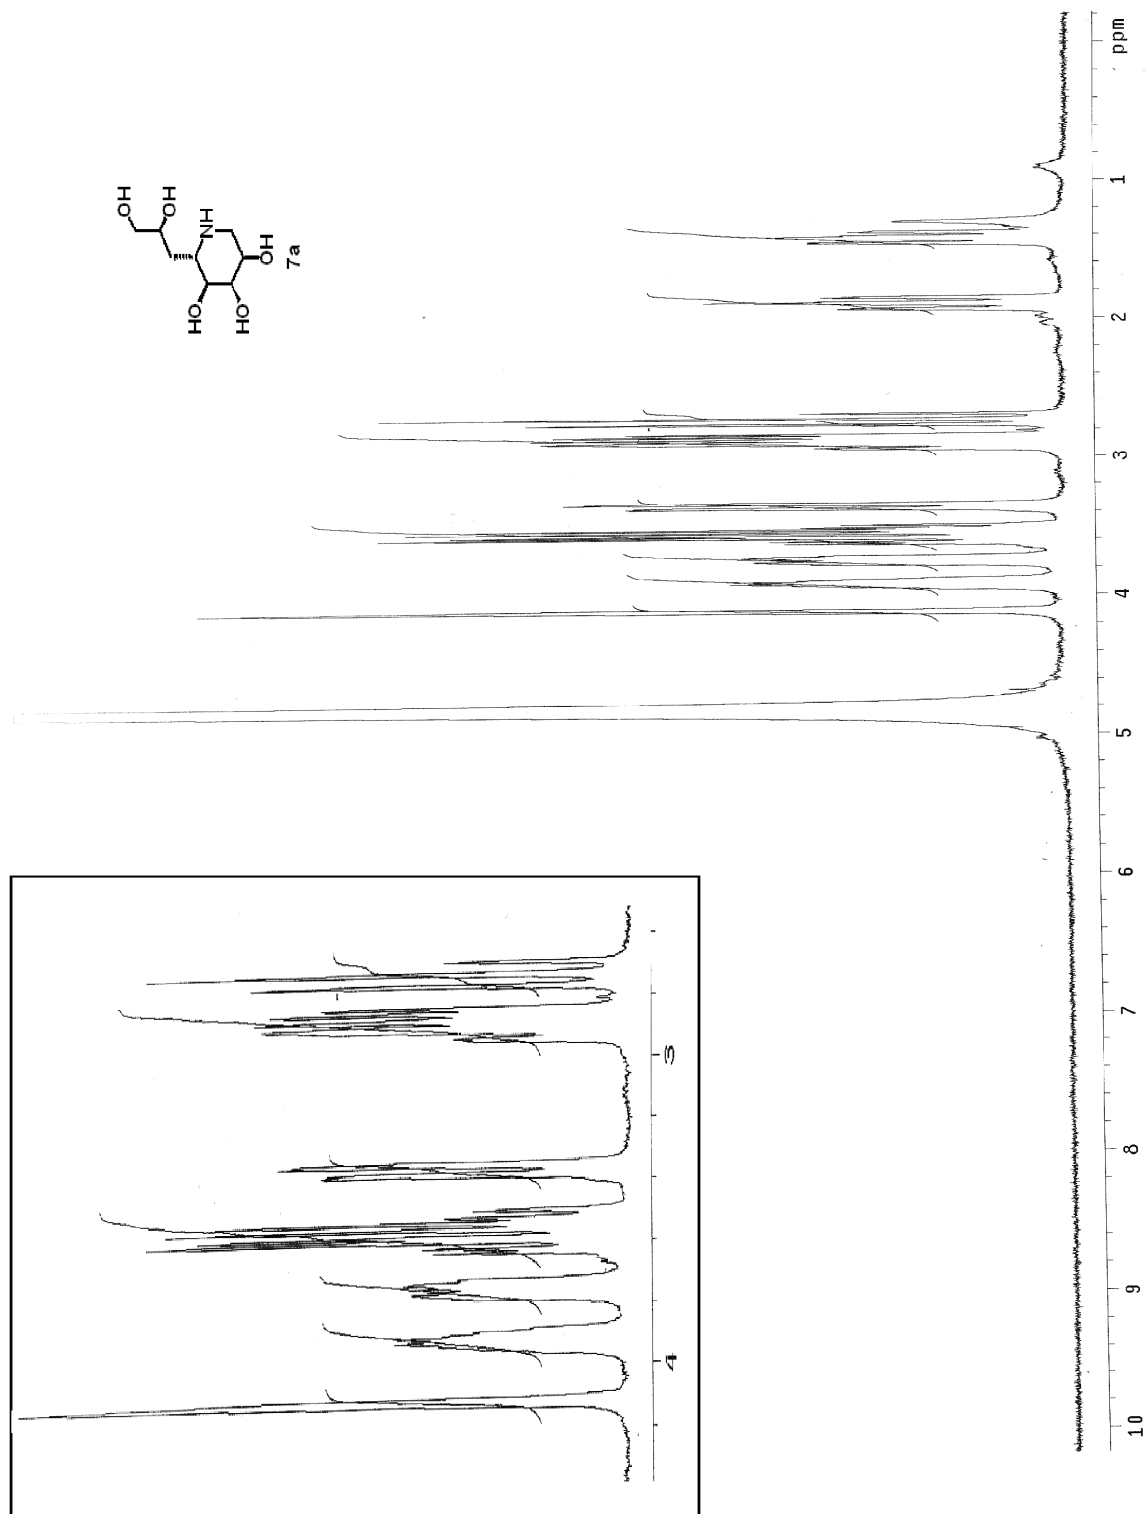

**Figure 11S:  $^1\text{H}$  (300 MHz,  $\text{D}_2\text{O}$ ) Spectrum of compound **7a****

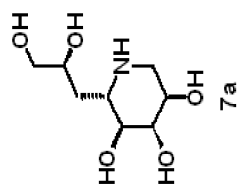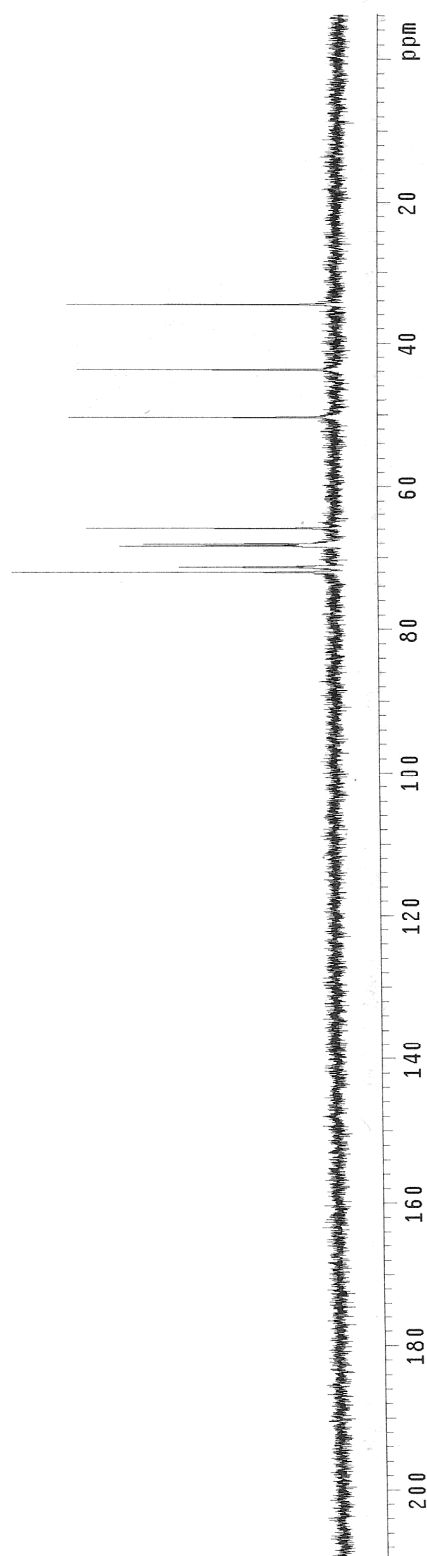

Figure 12S:  $^{13}\text{C}$  (75 MHz,  $\text{D}_2\text{O}$ ) Spectrum of compound 7a

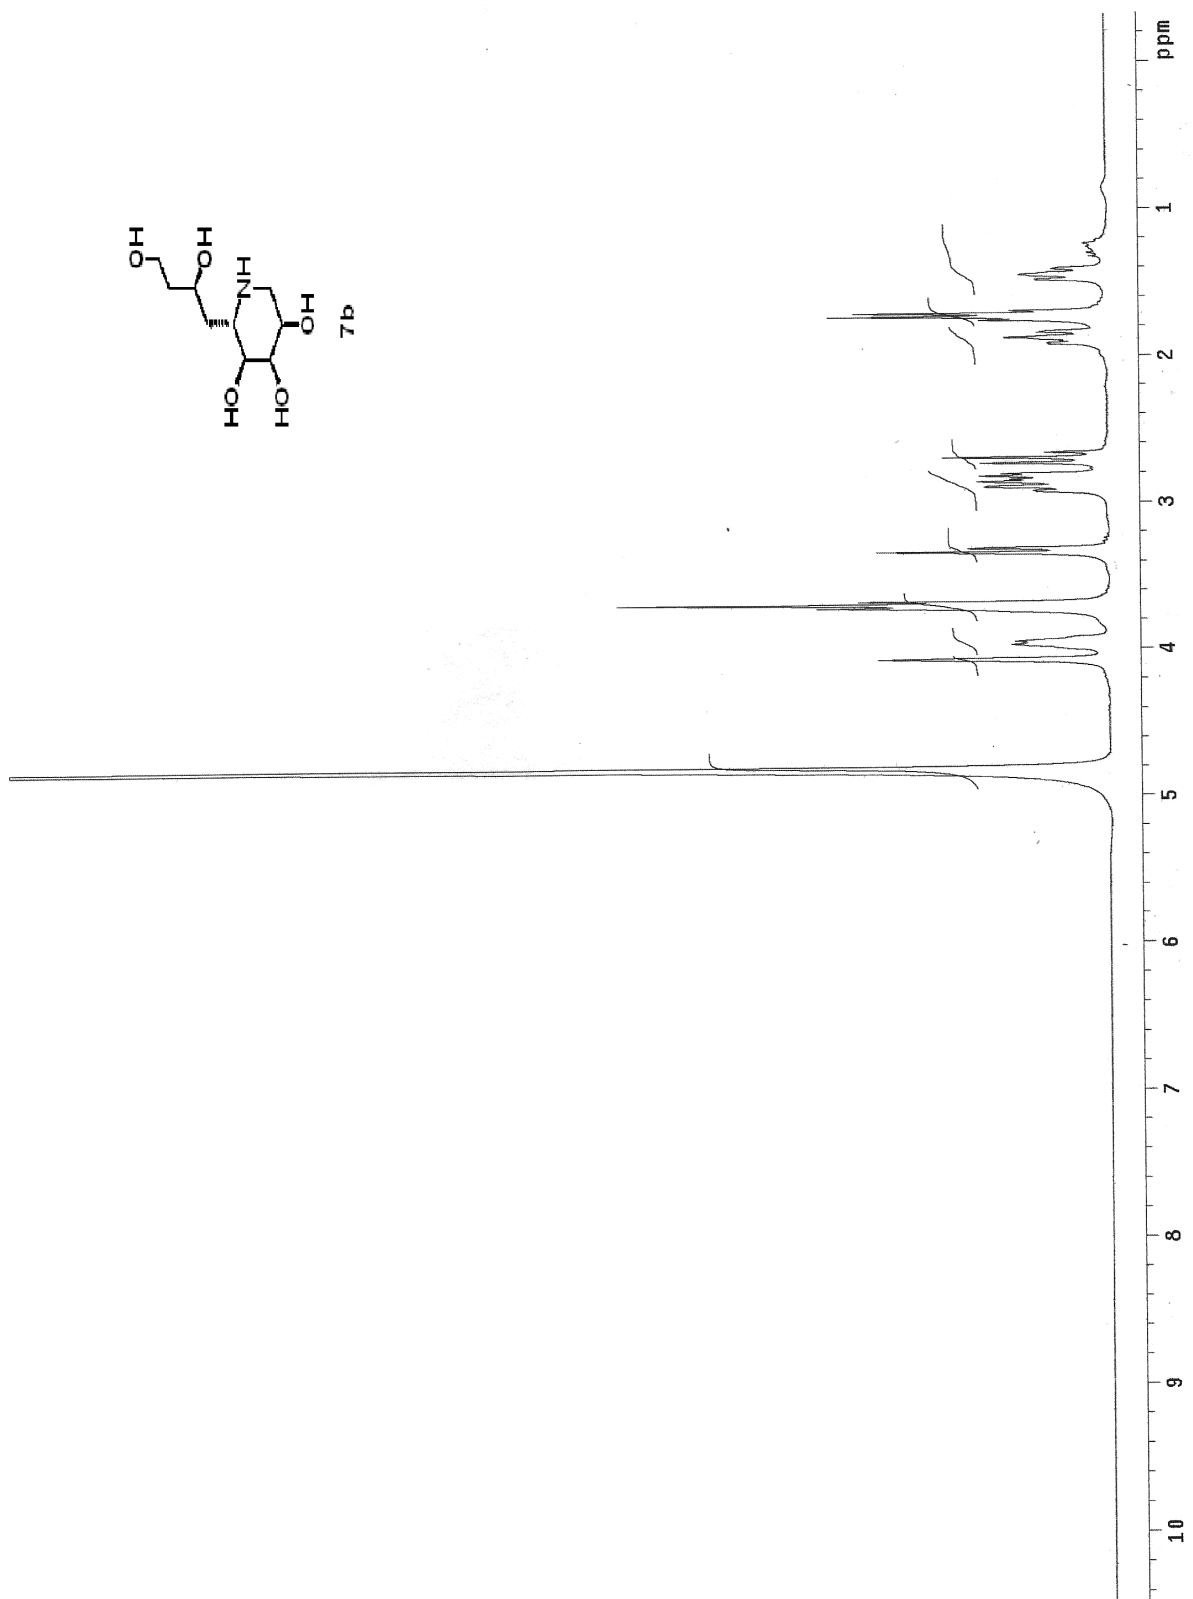

Figure 13S: <sup>1</sup>H (300 MHz, D<sub>2</sub>O) Spectrum of compound 7b

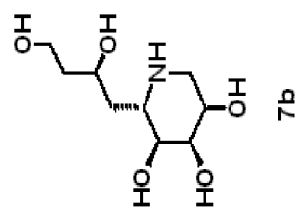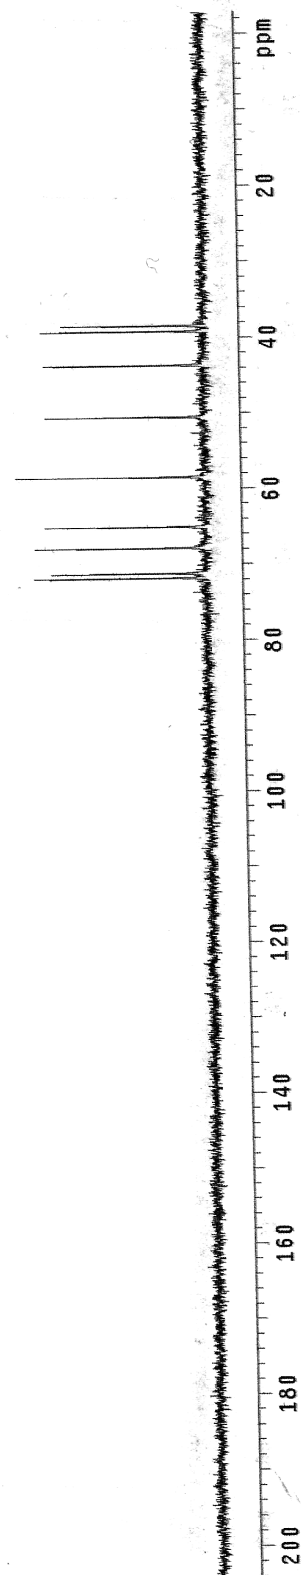

Figure 14S:  $^{13}\text{C}$  (75 MHz,  $\text{D}_2\text{O}$ ) Spectrum of compound 7b

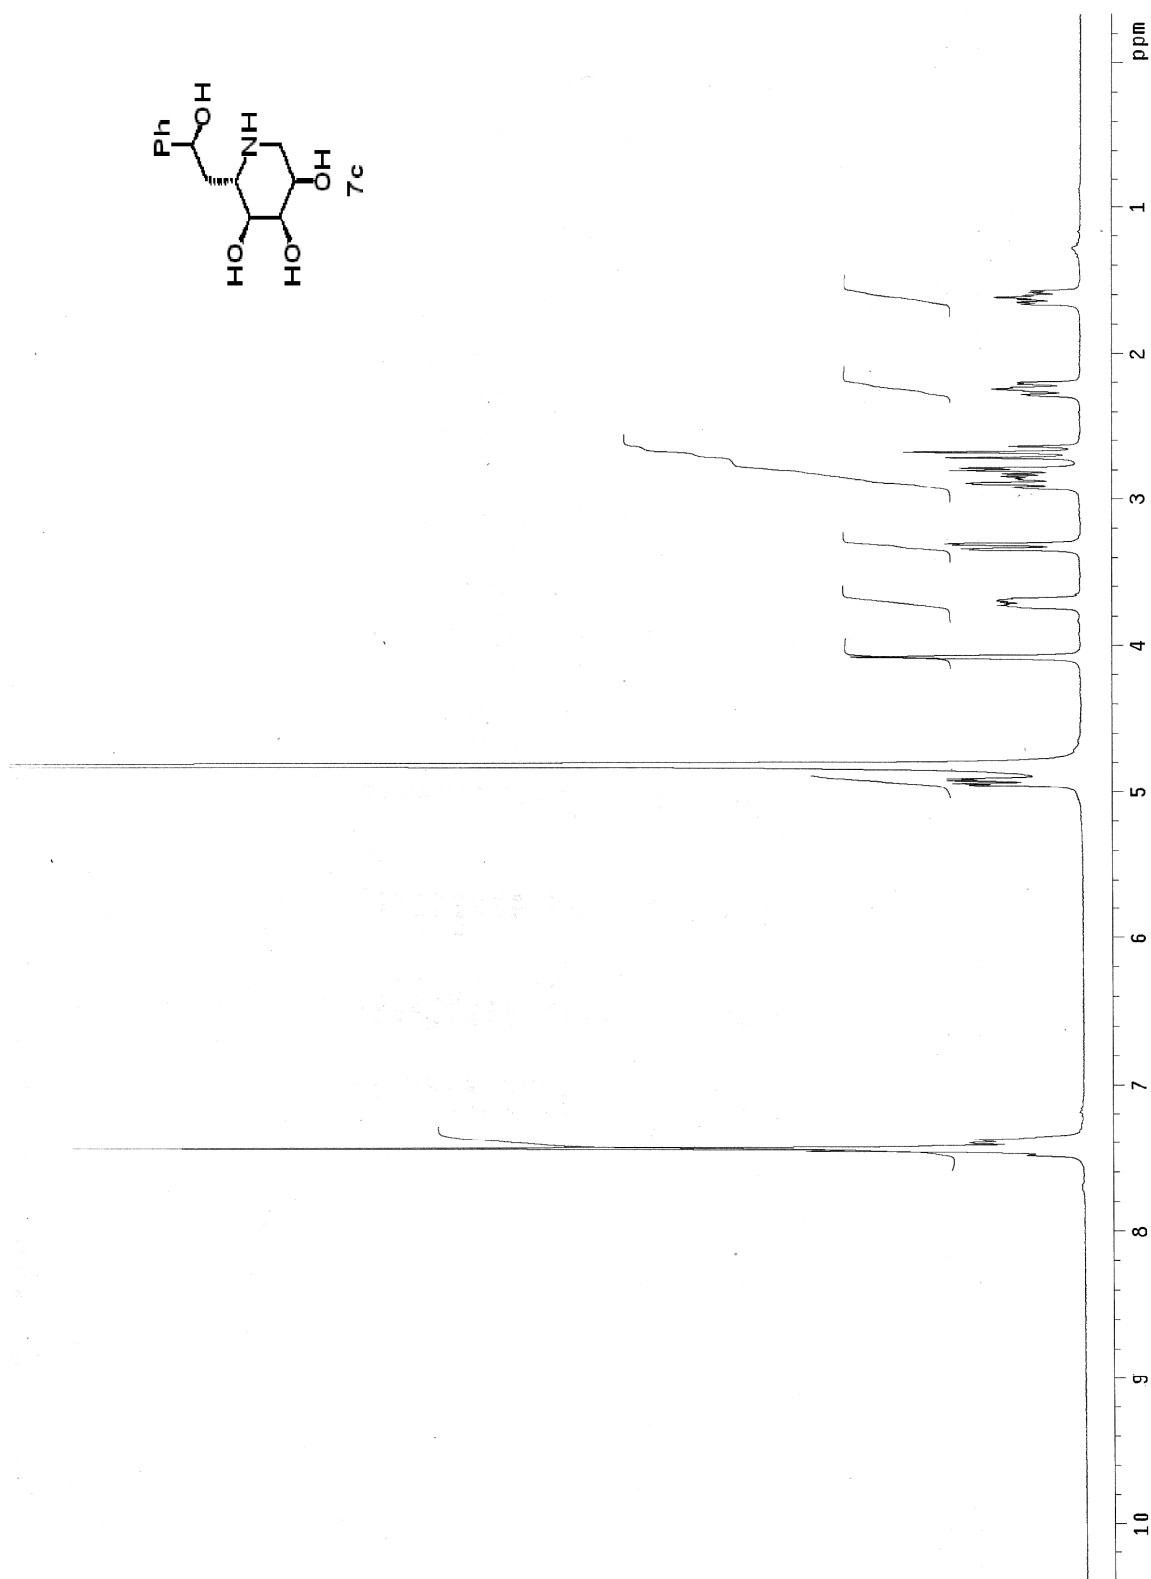

Figure 15S:  $^1\text{H}$  (300 MHz,  $\text{D}_2\text{O}$ ) Spectrum of compound **7c**



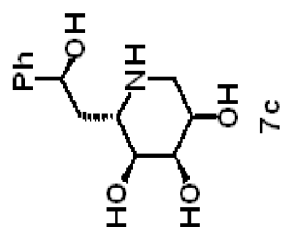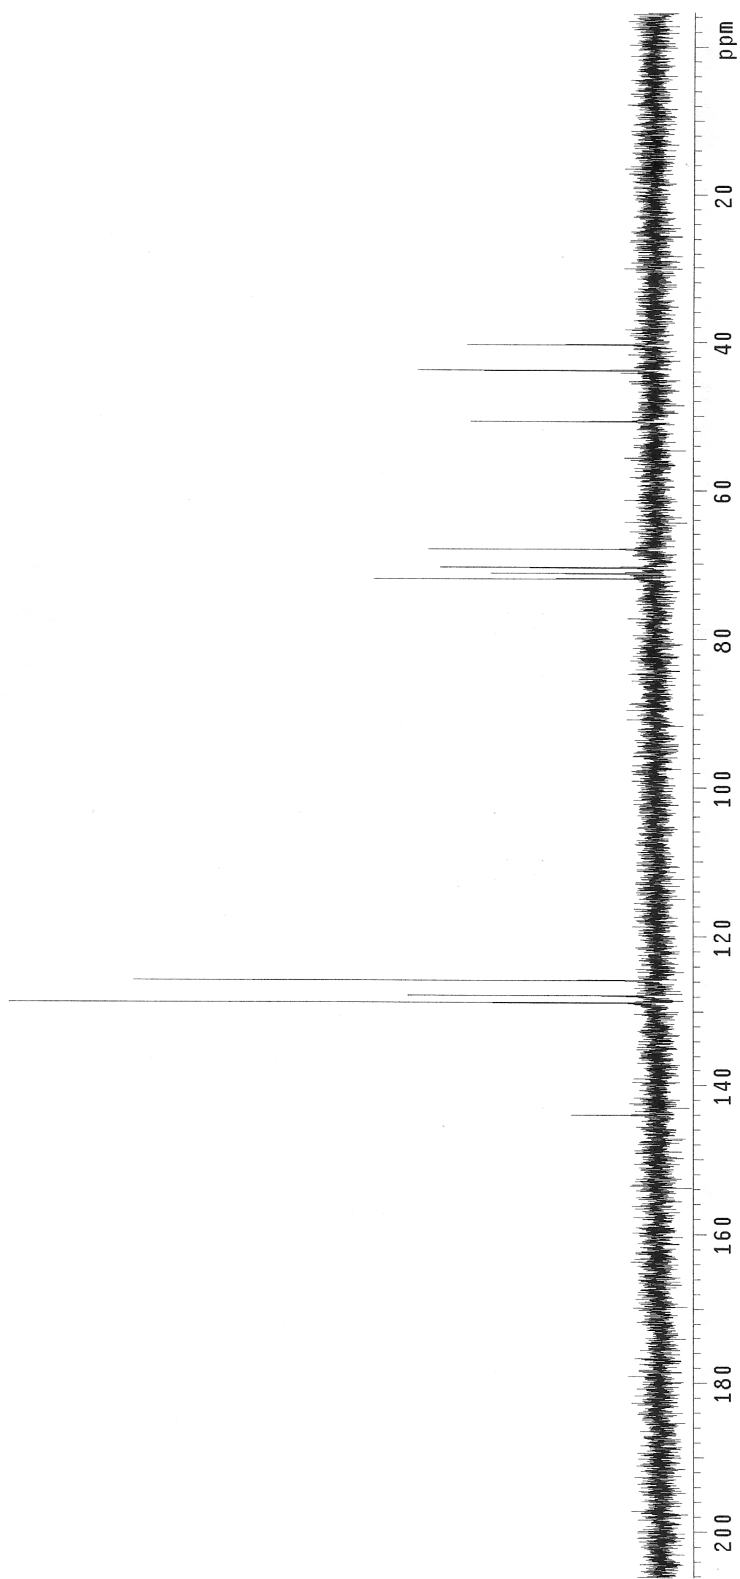

**Figure 16S:  $^{13}\text{C}$  (75 MHz,  $\text{D}_2\text{O}$ ) Spectrum of compound 7c**

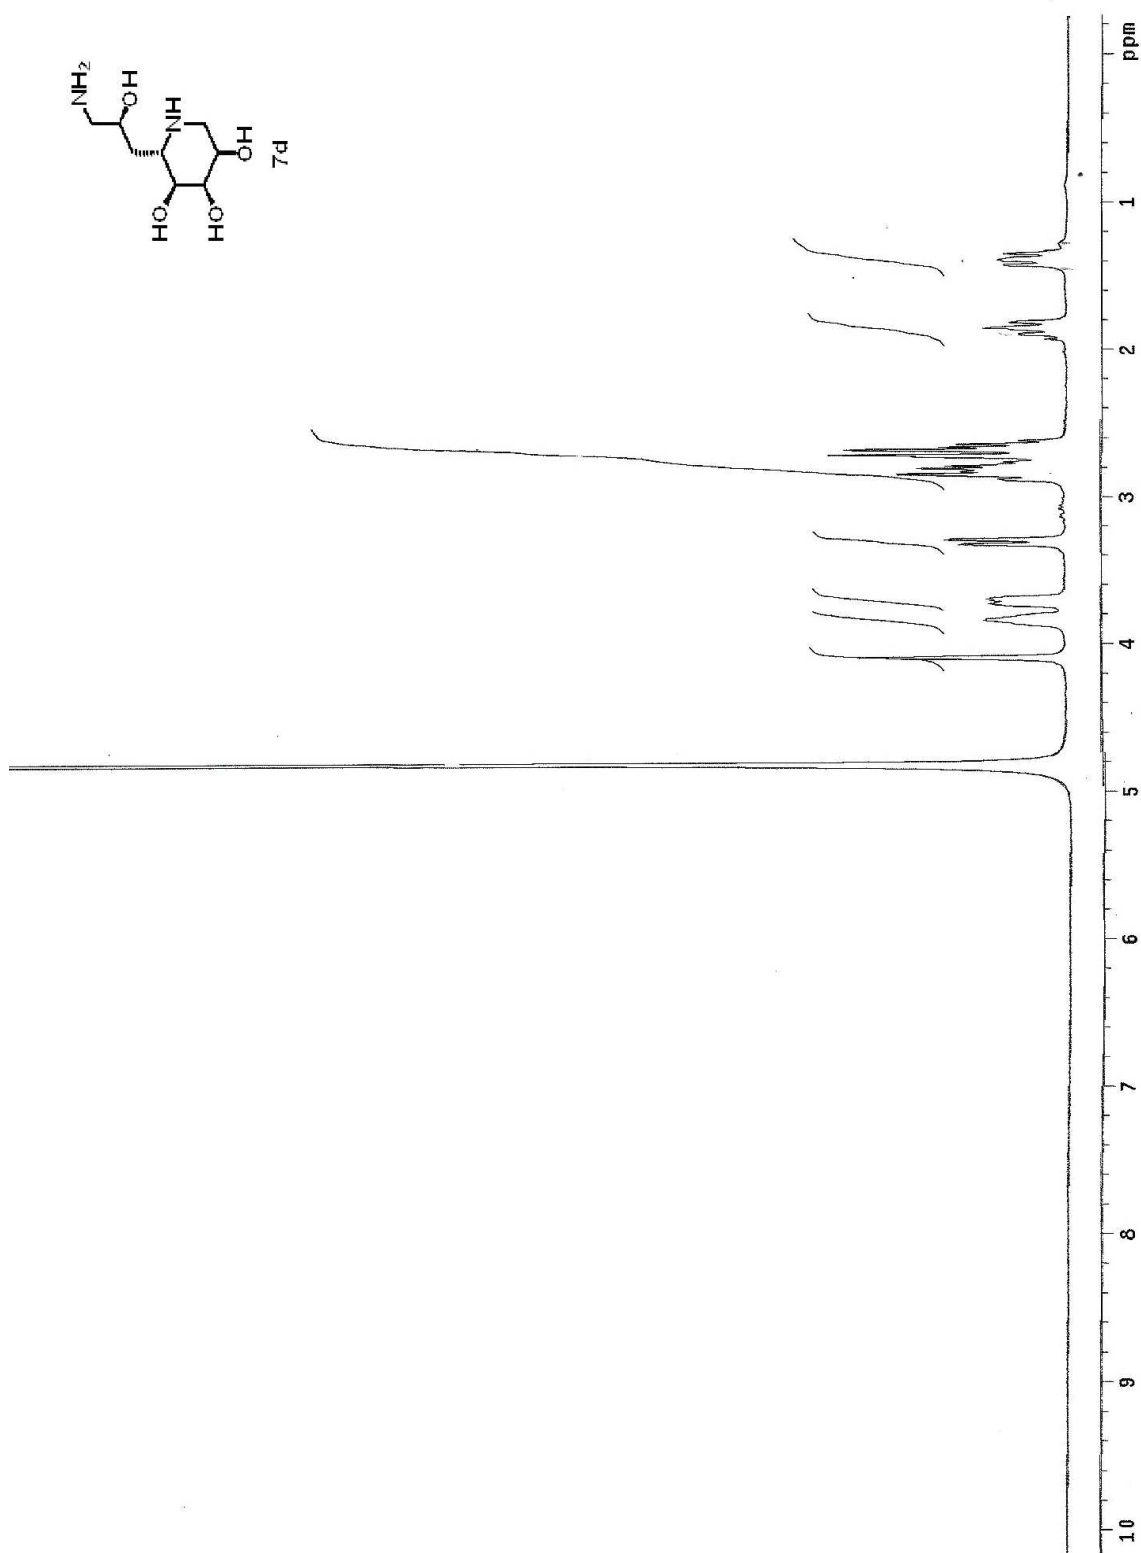

**Figure 17S:  $^1\text{H}$  (300 MHz,  $\text{D}_2\text{O}$ ) Spectrum of compound **7d****

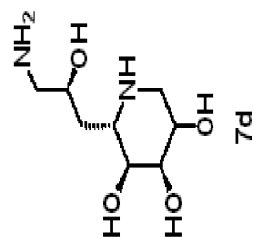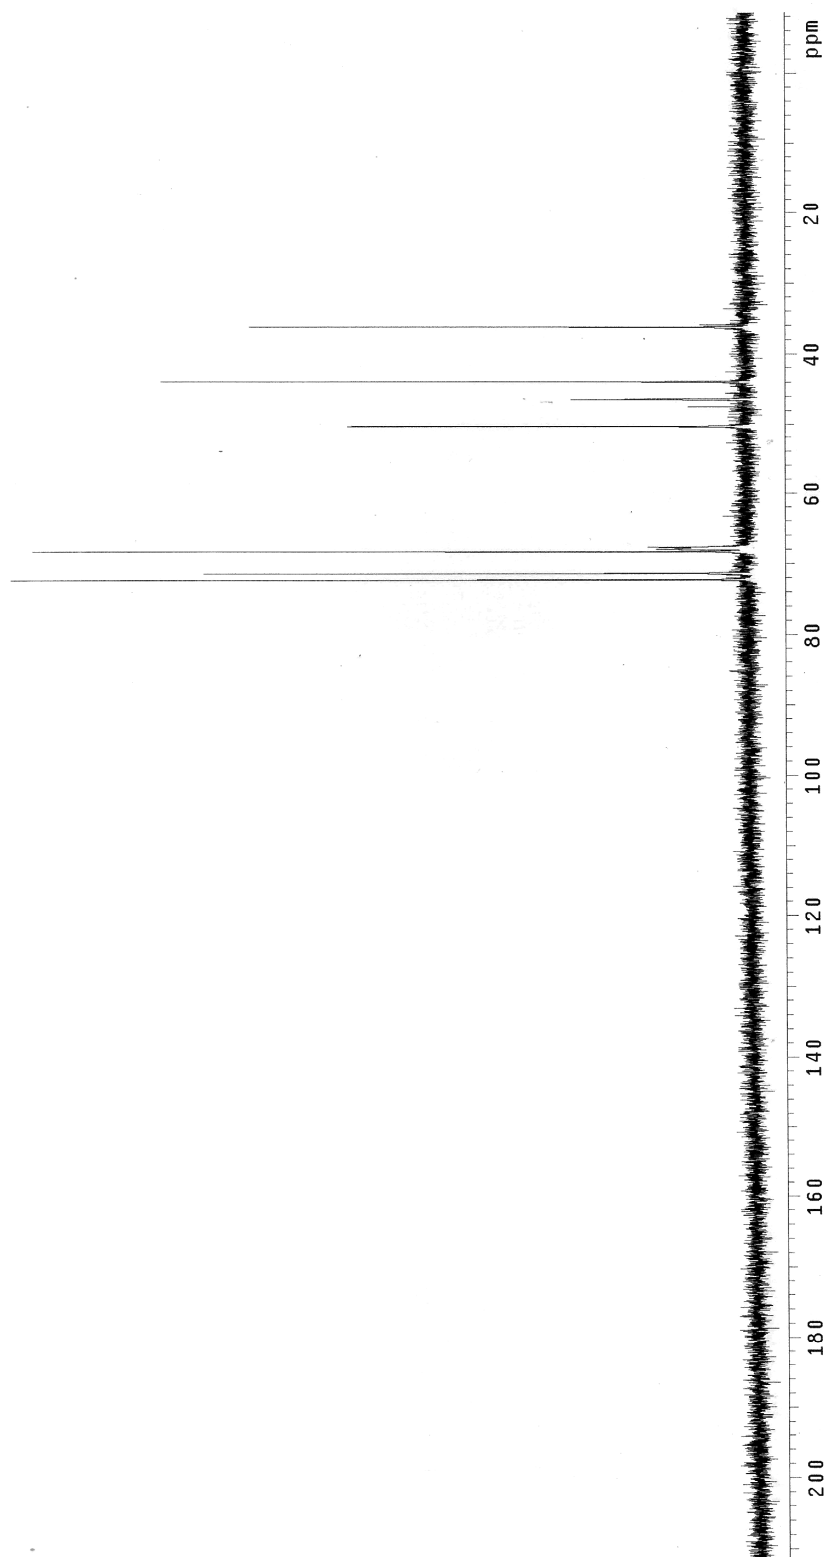

Figure 18S:  $^{13}\text{C}$  (75 MHz,  $\text{D}_2\text{O}$ ) Spectrum of compound 7d

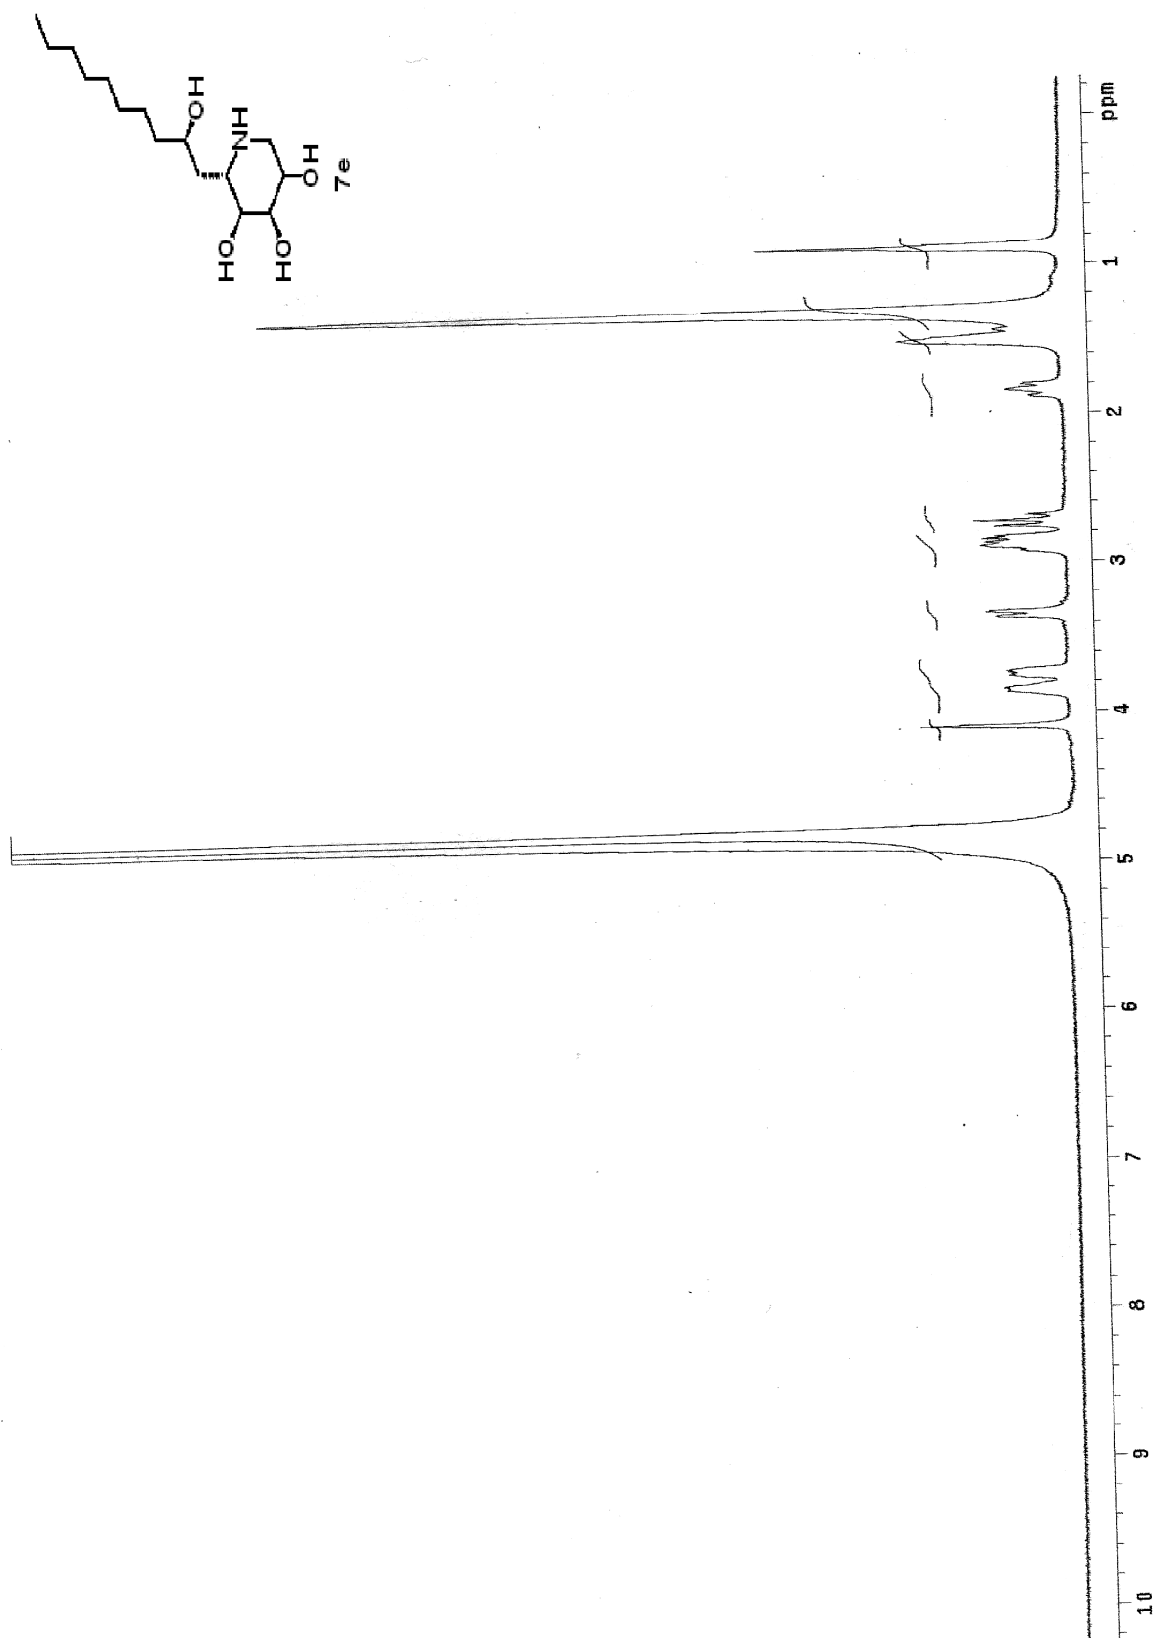

Figure 19S:  $^1\text{H}$  (300 MHz,  $\text{D}_2\text{O}$ ) Spectrum of compound **7e**

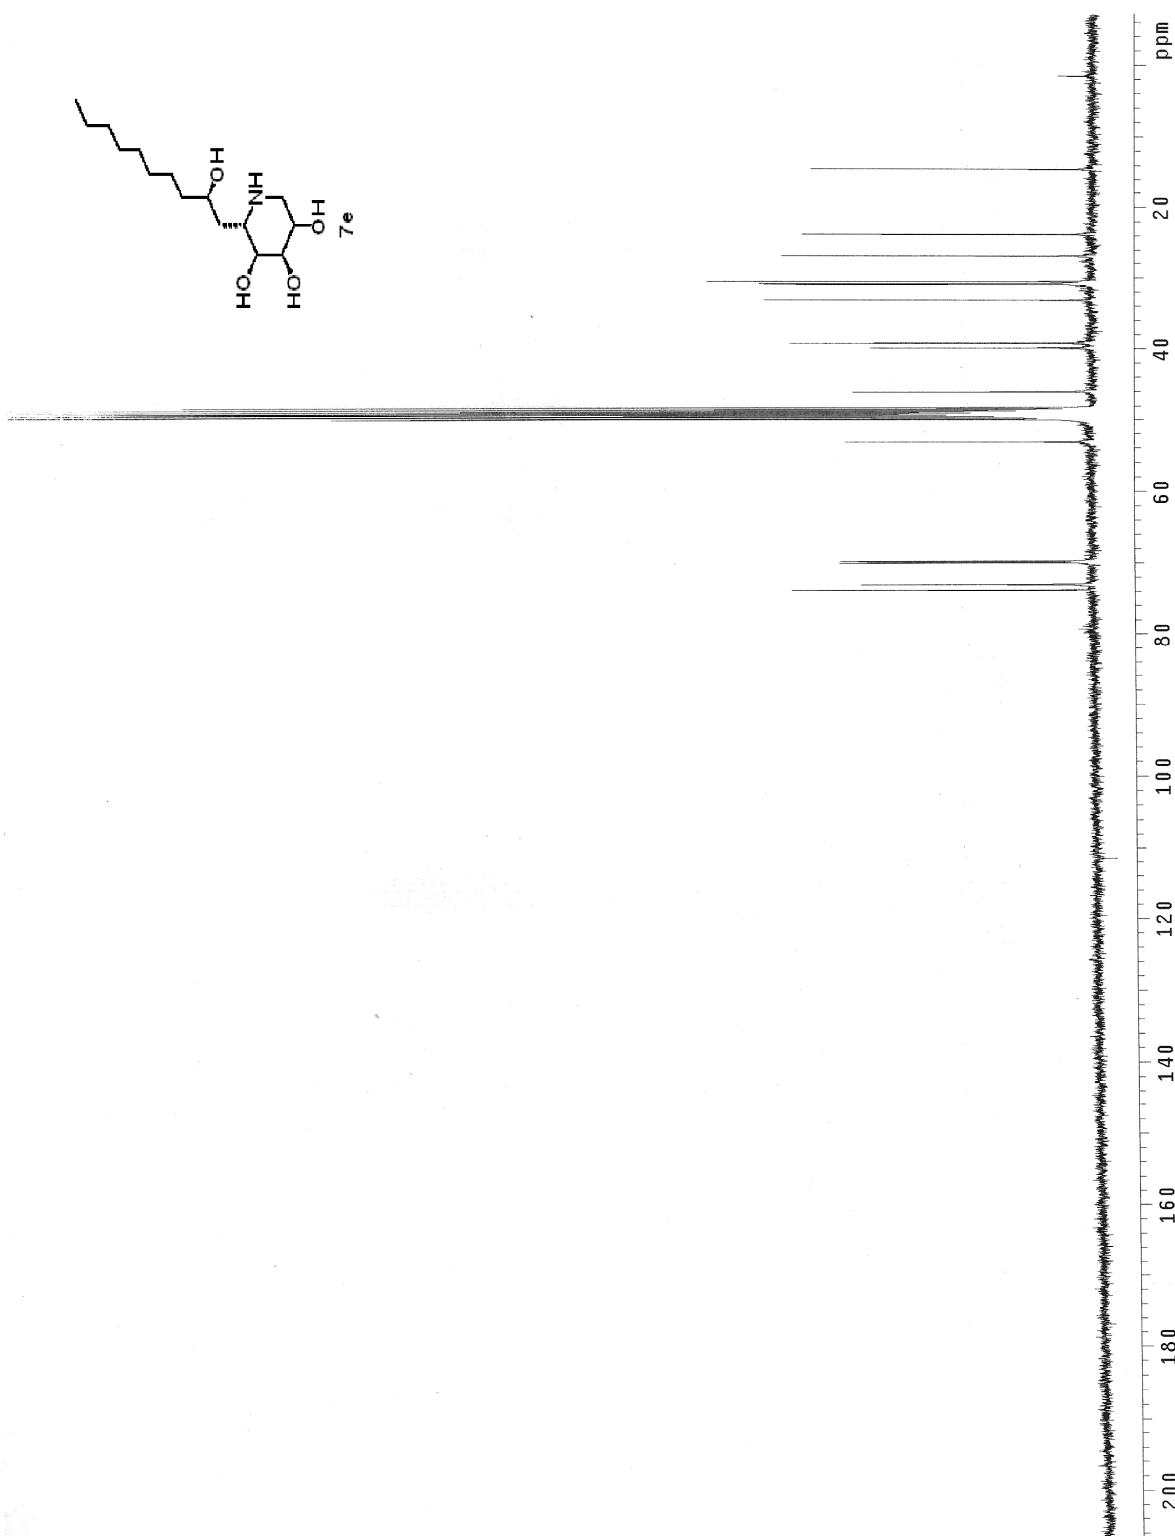

Figure 20S:  $^{13}\text{C}$  (75 MHz,  $\text{D}_2\text{O}$ ) Spectrum of compound **7e**

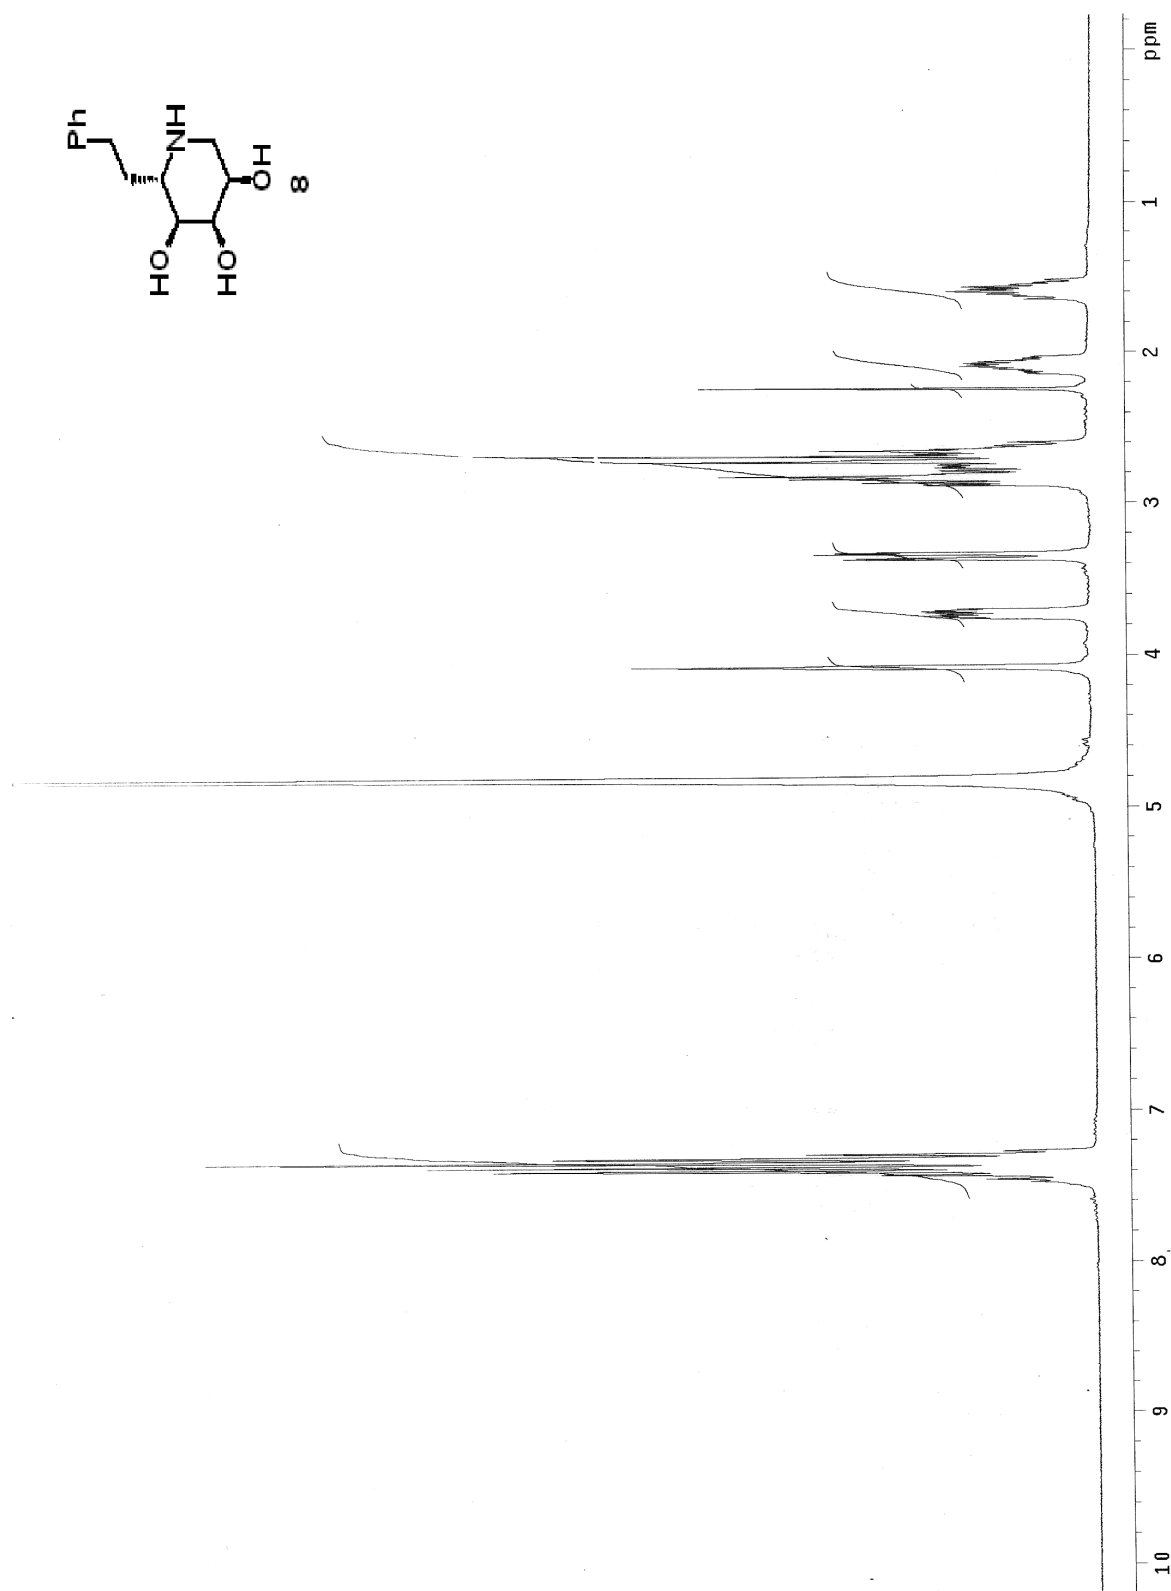

Figure 21S: <sup>1</sup>H (300 MHz, D<sub>2</sub>O) Spectrum of compound 8

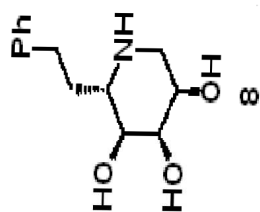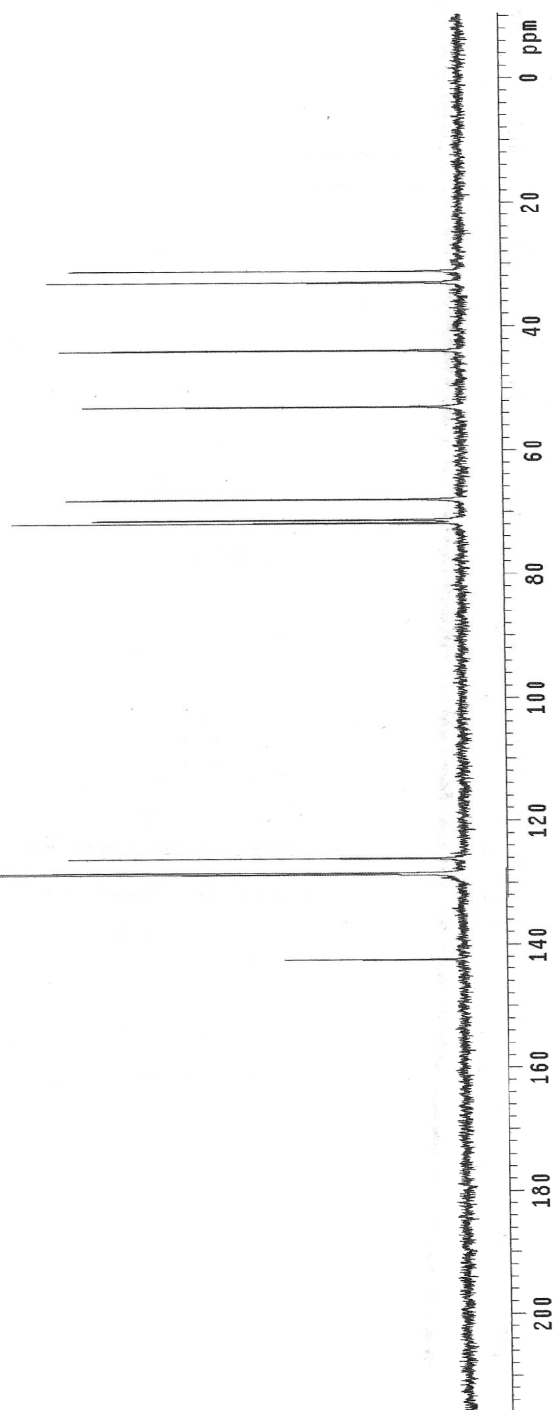

Figure 22S:  $^{13}\text{C}$  (75 MHz,  $\text{D}_2\text{O}$ ) Spectrum of compound 8

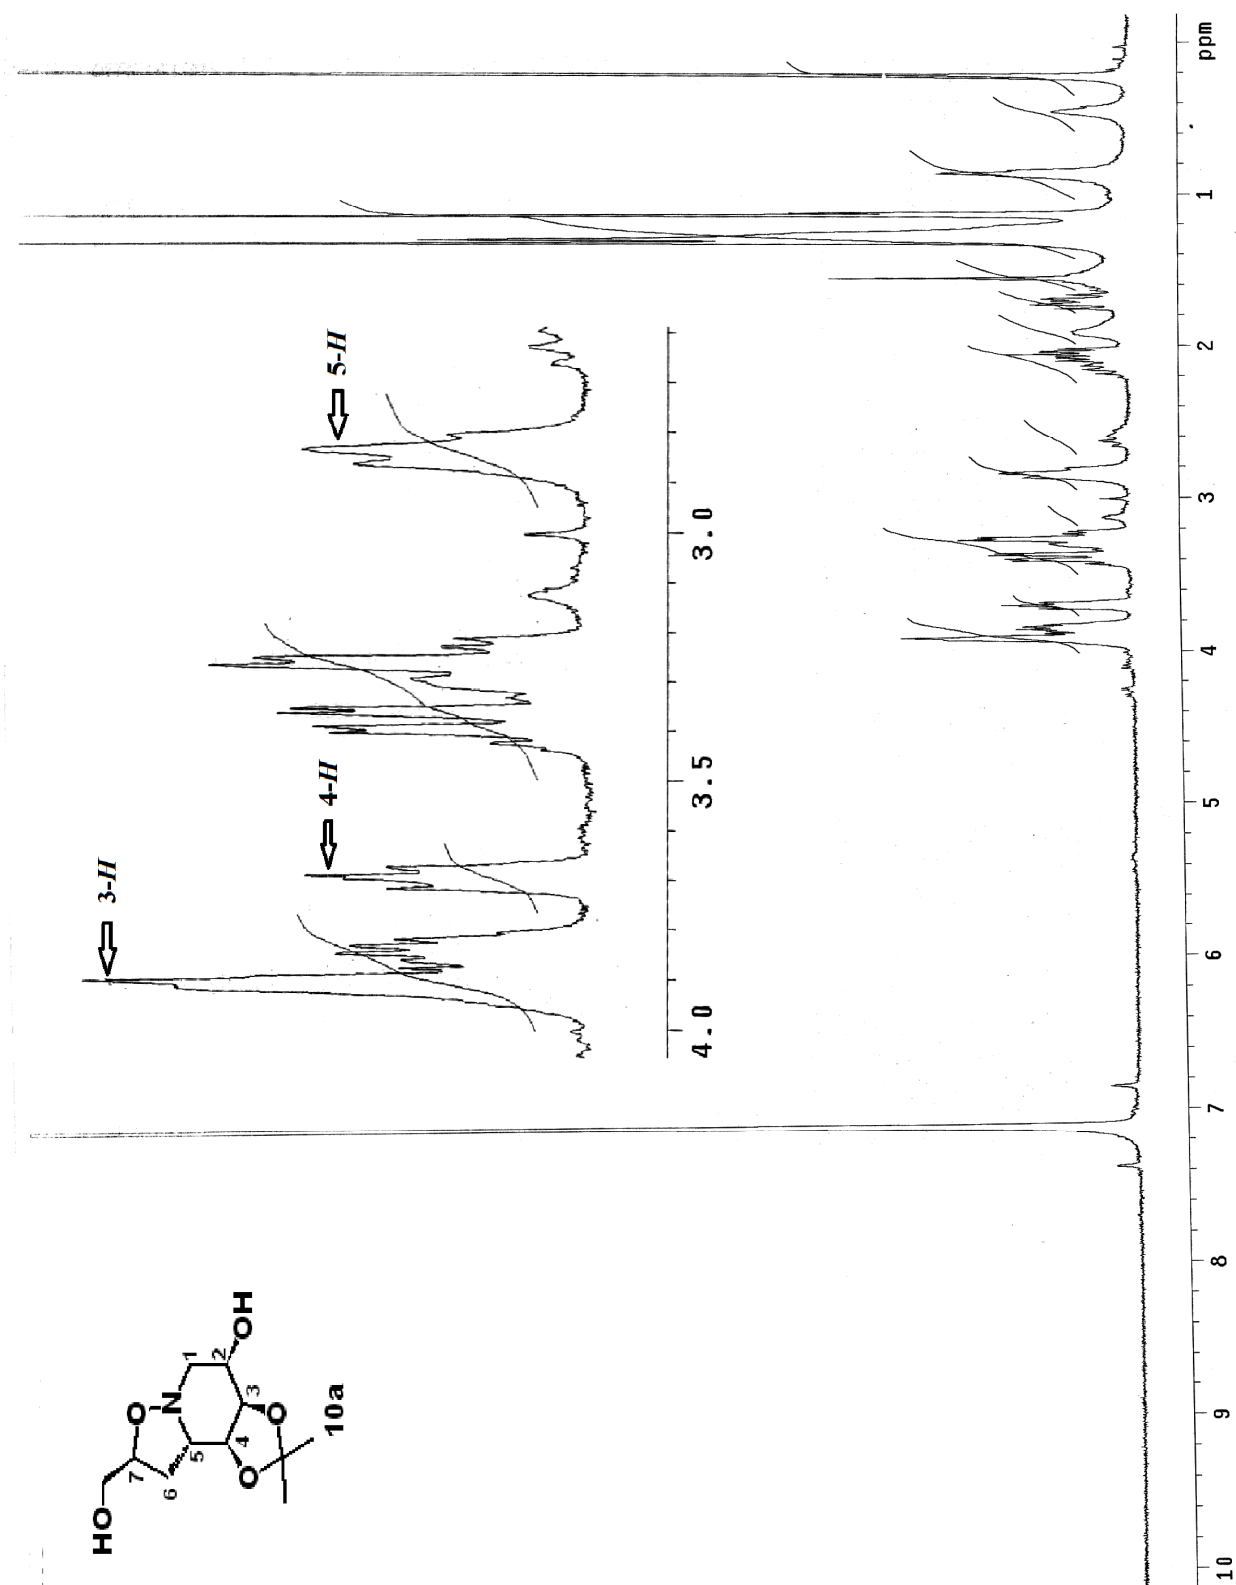

Figure 23S:  $^1\text{H}$  (300 MHz, benzene- $d_6$ ) Spectrum of compound 10a at 50°C



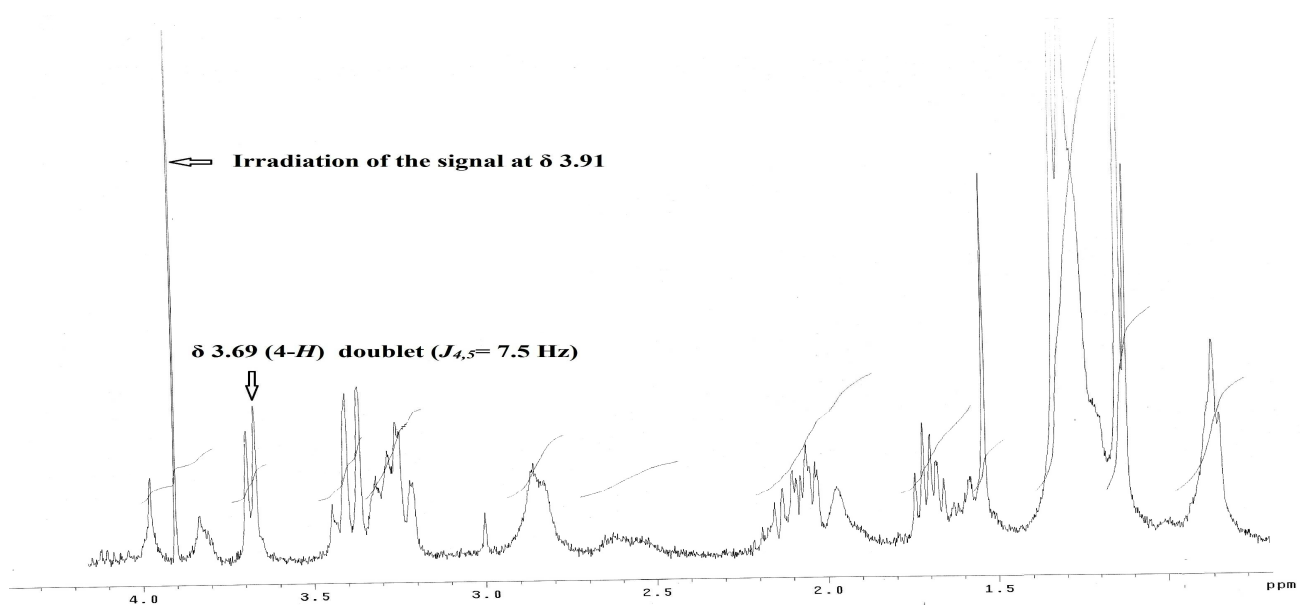

Figure 23.1S:  $^1\text{H}$  (300 MHz, benzene- $d_6$ ) Decoupled Spectrum of compound 10a at 50°C

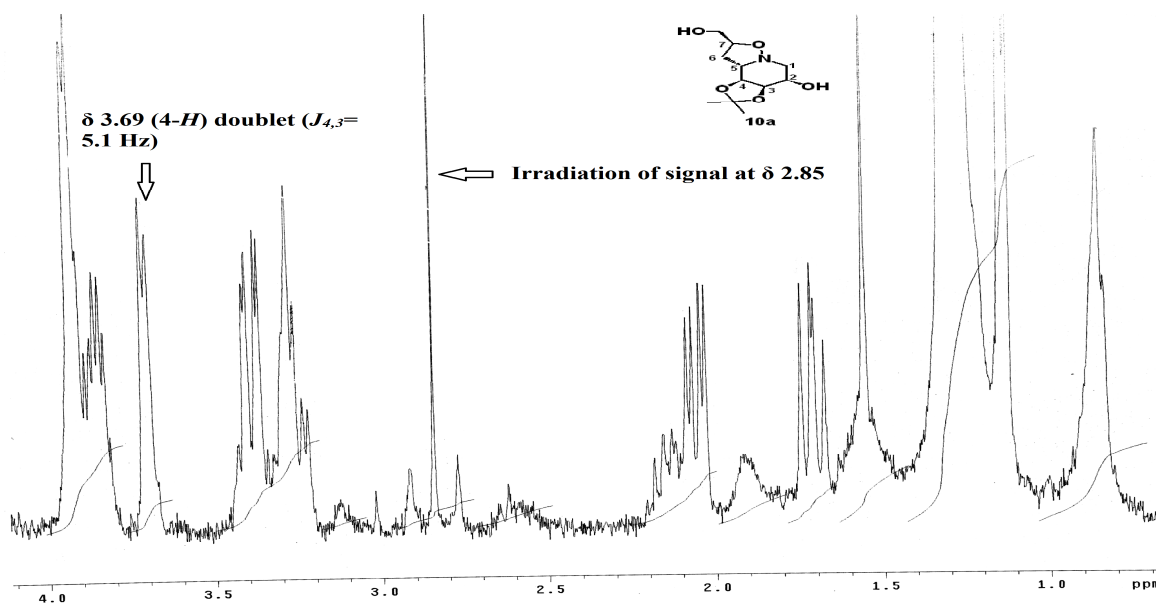

Figure 23.2S:  $^1\text{H}$  (300 MHz, benzene- $d_6$ ) Decoupling Spectrum of compound 10a at 50°C

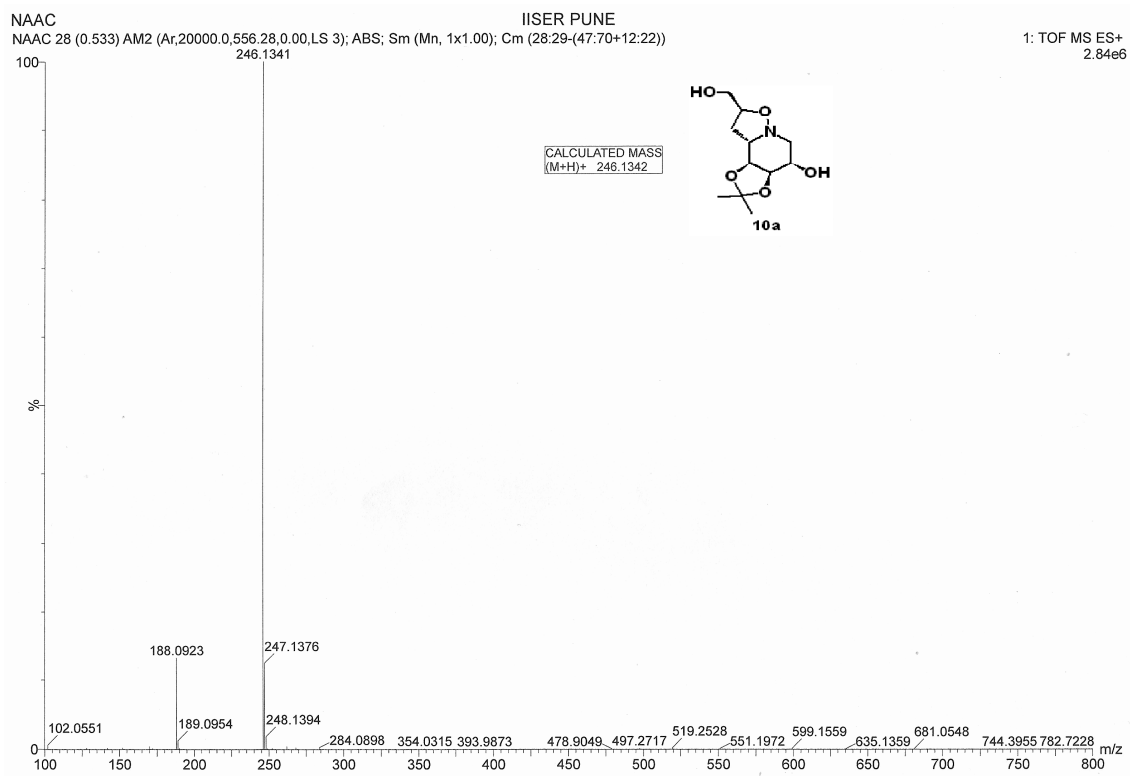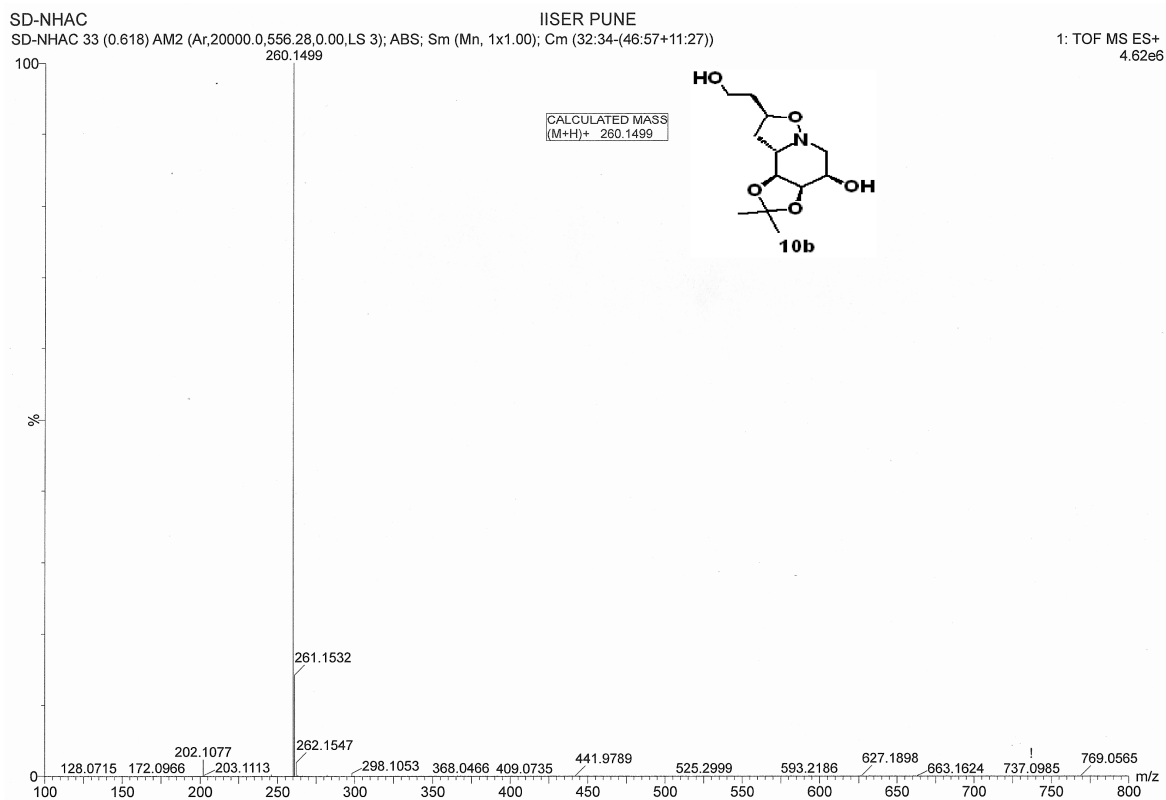

NSUC

IISER PUNE

NSUC 86 (1.582) AM2 (Ar,20000.0,556.28,0.00,LS 3); ABS; Sm (Mn, 1x1.00); Cm (86-(93:109+73:82))

1: TOF MS ES+  
7.09e6

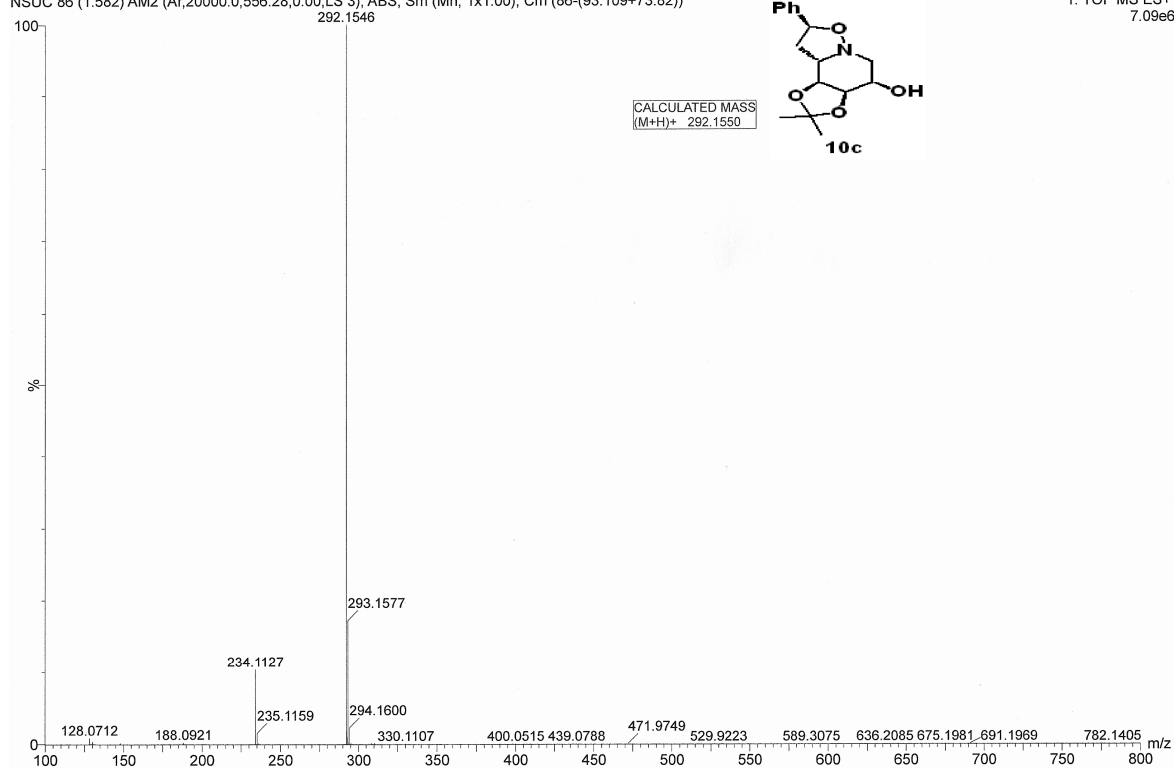

SD-NANC

IISER PUNE

SD-NANC 85 (1.565) AM2 (Ar,20000.0,556.28,0.00,LS 3); ABS; Sm (Mn, 1x1.00); Cm (85:86-(96:115+62:81))

1: TOF MS ES+  
4.74e6

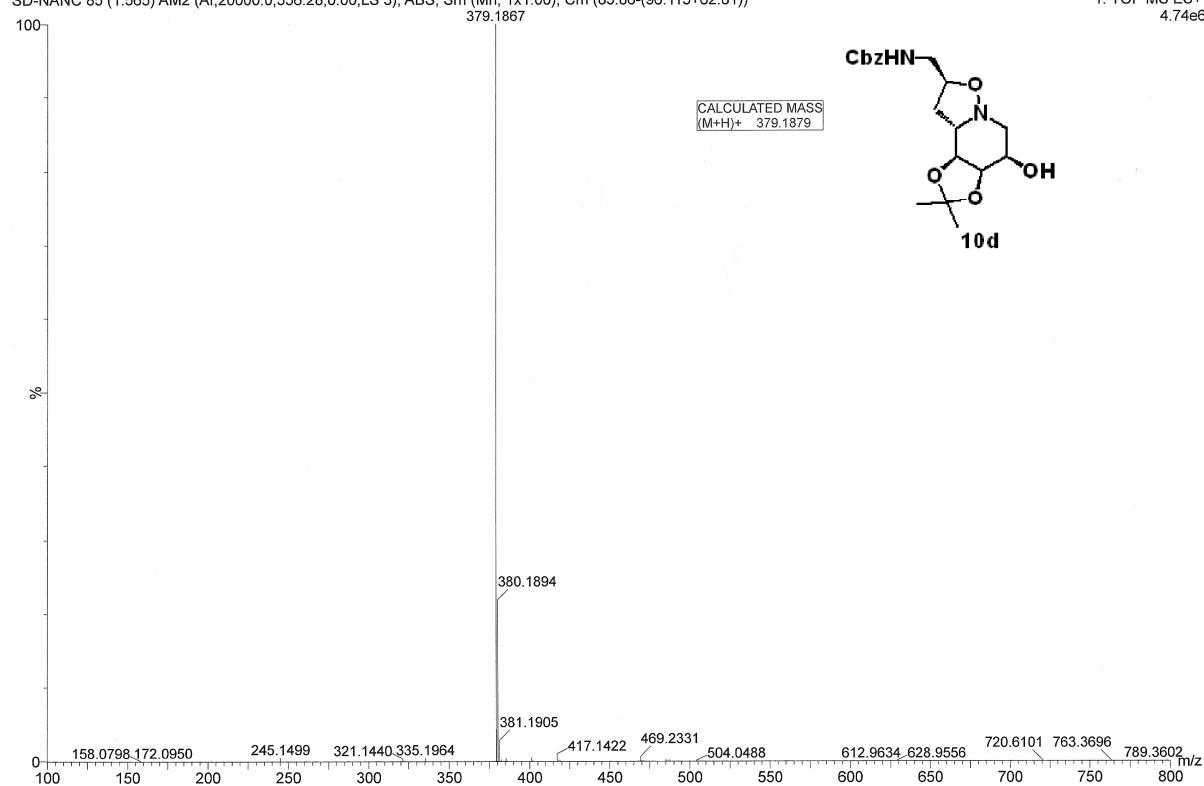

NDC-1

IISER PUNE

NDC-1 127 (2.341) AM2 (Ar,20000.0,556.28,0.00,LS 3); ABS; Sm (Mn, 1x1.00); Cm (127-(134:140+118:124))

1: TOF MS ES+  
7.80e6

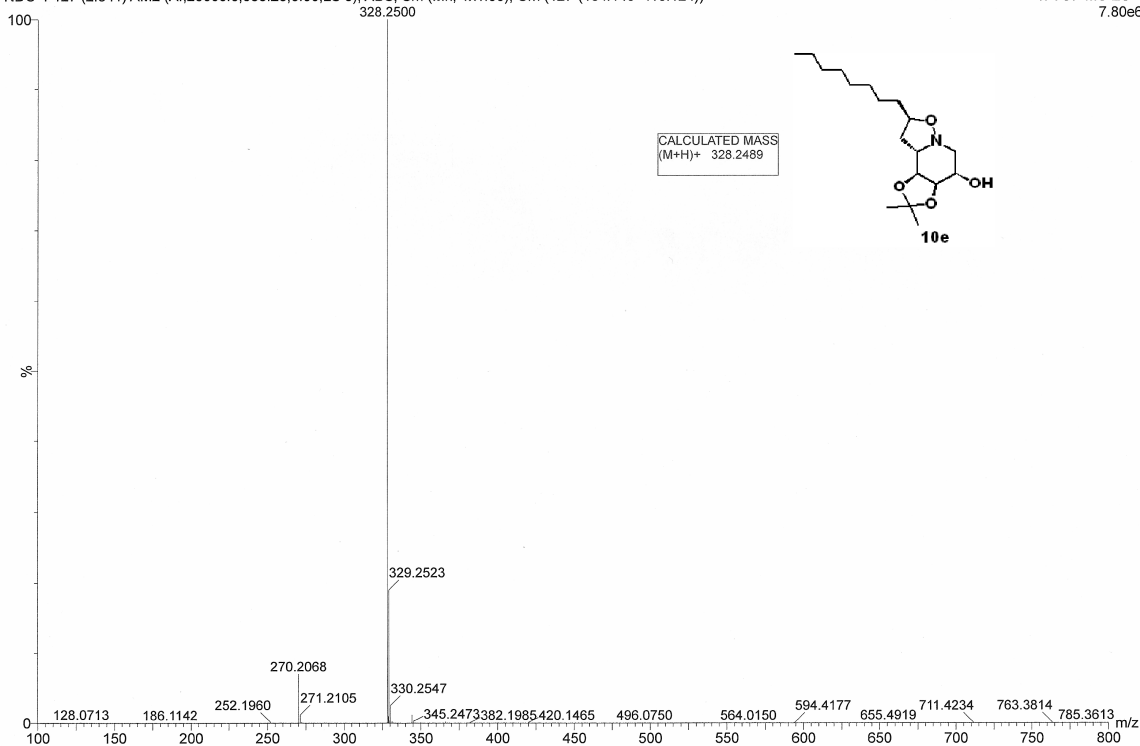

IAA

IISER PUNE

IAA 17 (0.325) AM2 (Ar,20000.0,556.28,0.00,LS 3); ABS; Sm (Mn, 1x1.00); Cm (17:18-(24:31+9:13))

1: TOF MS ES+  
1.47e6

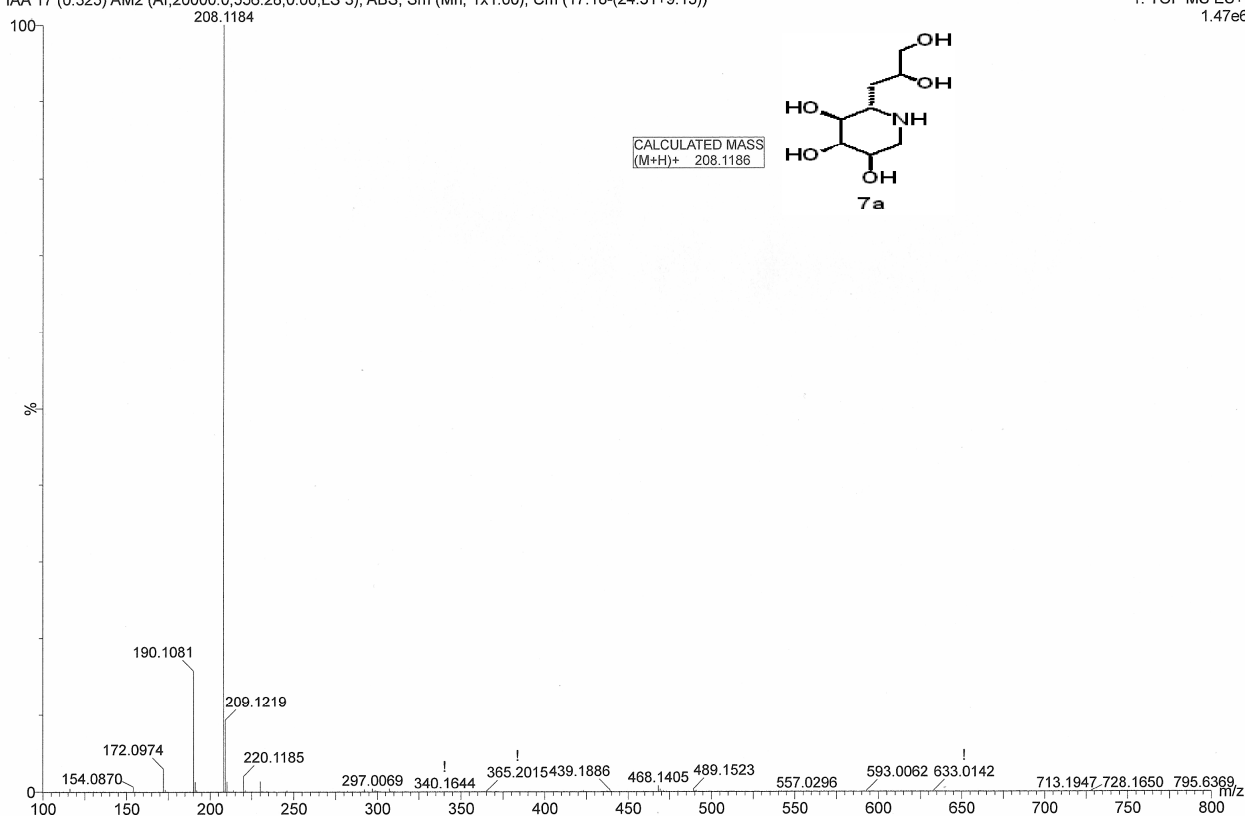

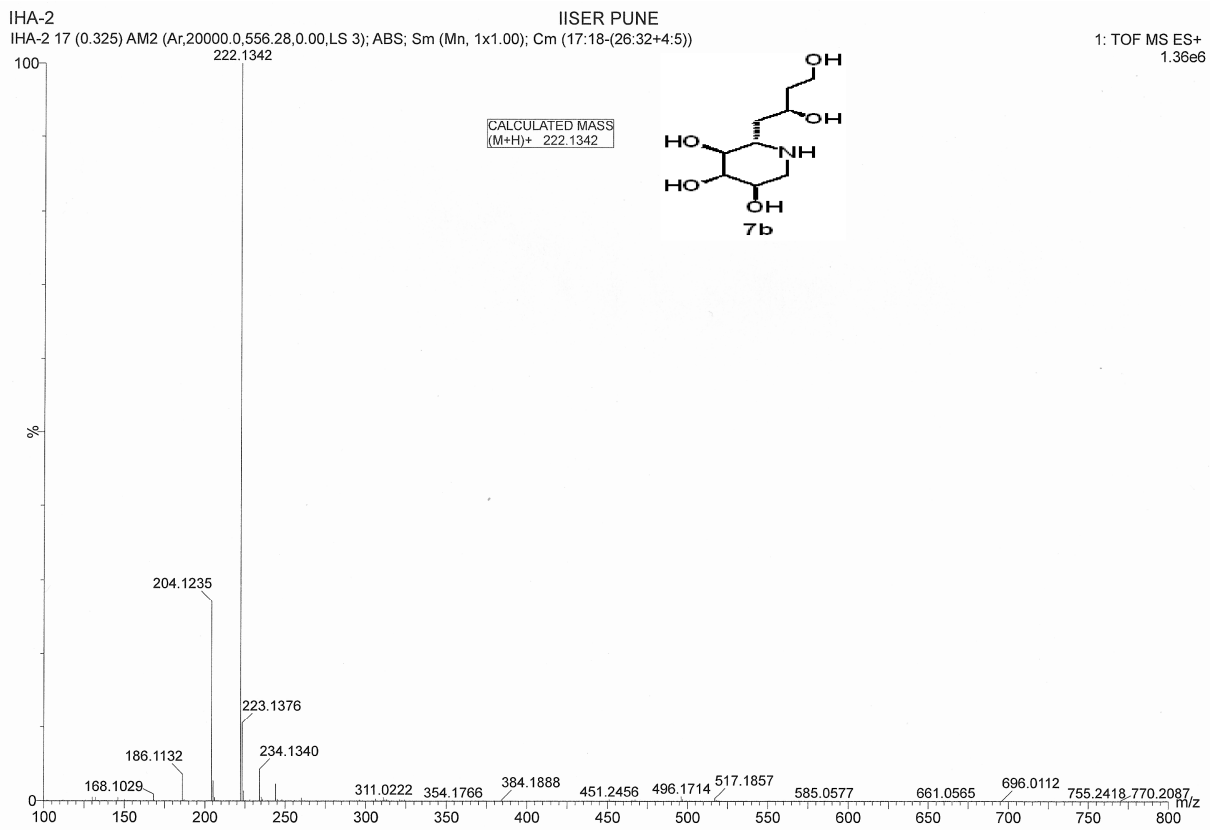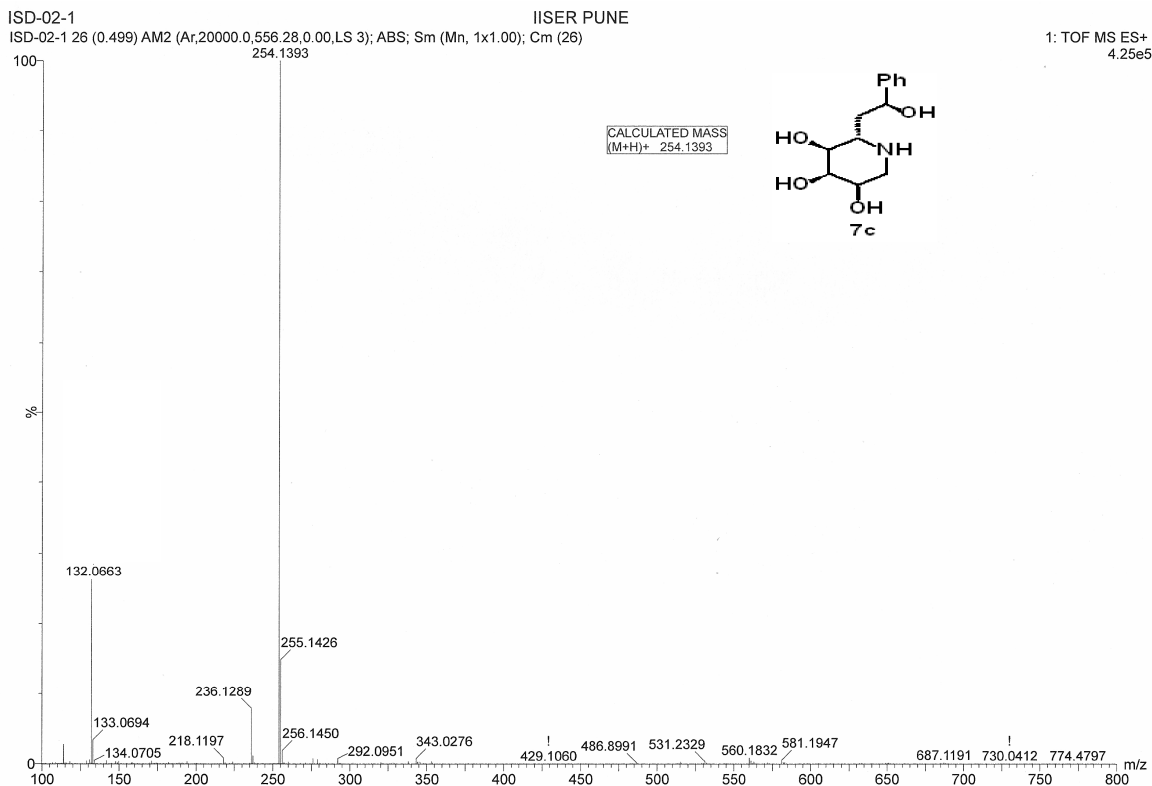

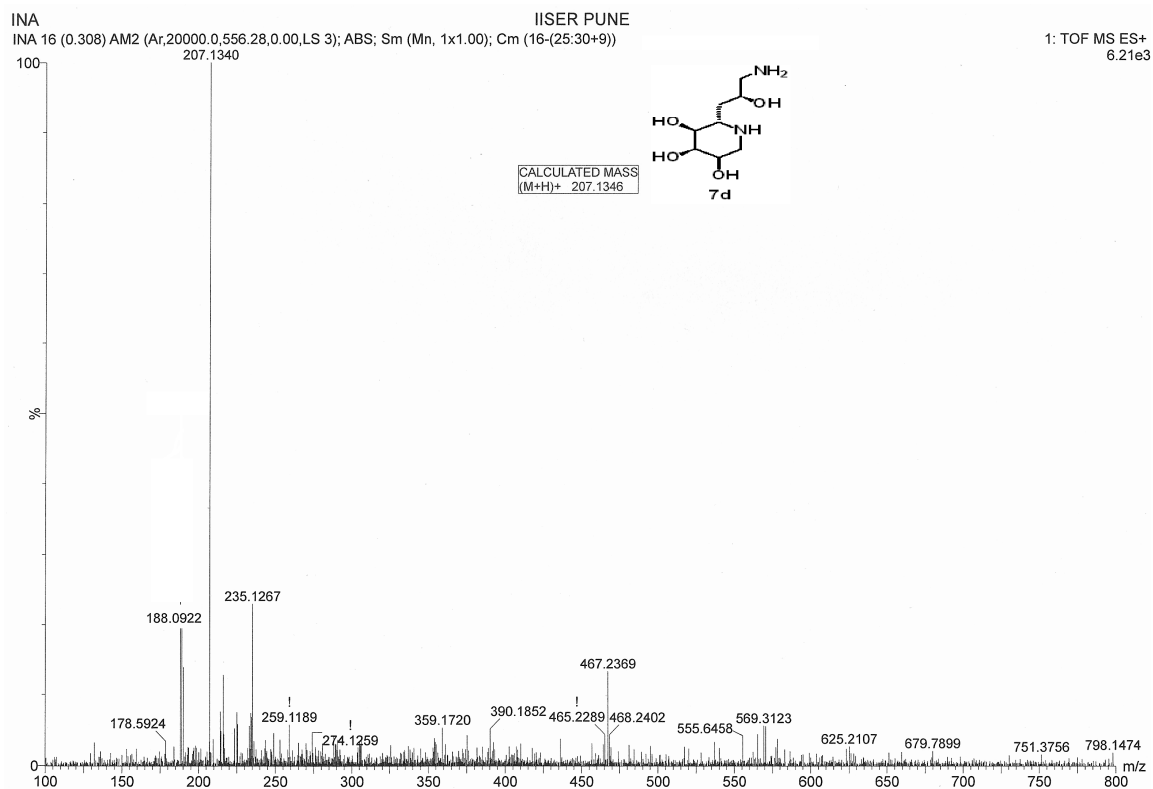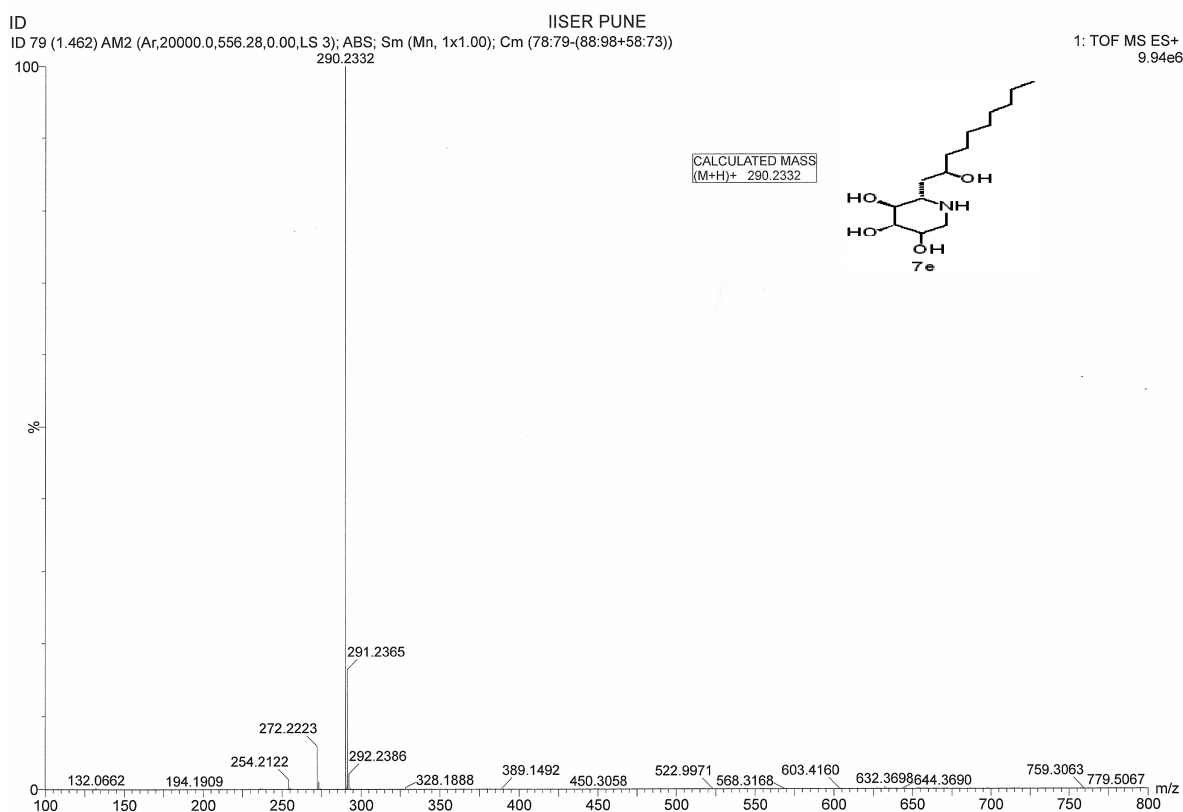

ISD-01

IISER PUNE

ISD-01 40 (0.757) AM2 (Ar,20000.0,556.28,0.00,LS 3); ABS; Sm (Mn, 1x1.00); Cm (38:40-(53:63+20:33))

1: TOF MS ES+  
3.14e6

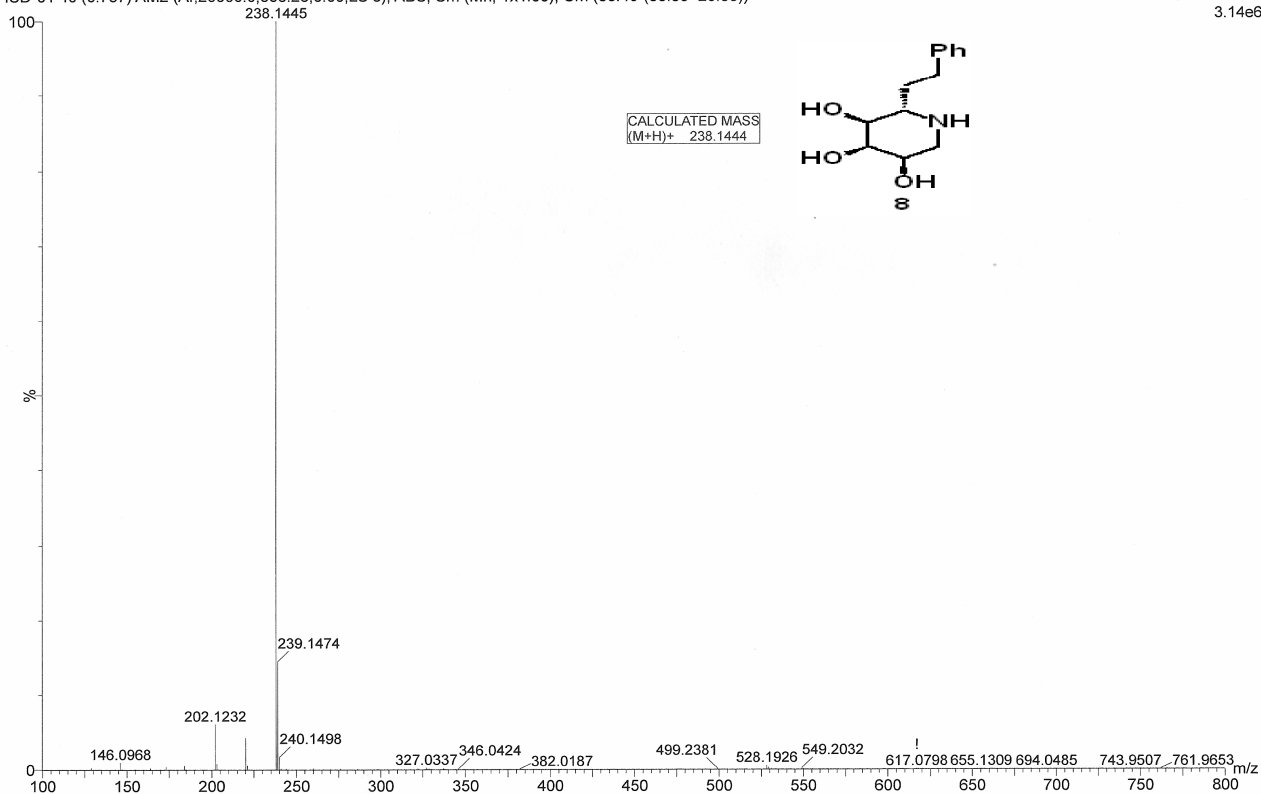

CALCULATED MASS  
(M+H)+ 238.1444

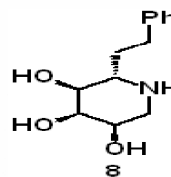

**Supplementary Figure 24S.** Human Bgal enzyme activity inhibition curves in presence of increasing concentration [ $\mu\text{M}$ ] of compounds 7a-7e and 8. Fraction of bGal enzyme activity remaining was calculated as bgal Activity in presence of compound/bgal activity in absence of any compound. Activity was monitored using MU-bGal (0.45 mM) at pH 4.5. Reactions were performed in triplicate. Error bars associated with each data point represents standard deviation ( $n=3$ ). Nonlinear curve fitting to extract  $\text{IC}_{50}$  values was performed within GraphPad Prism 5.2

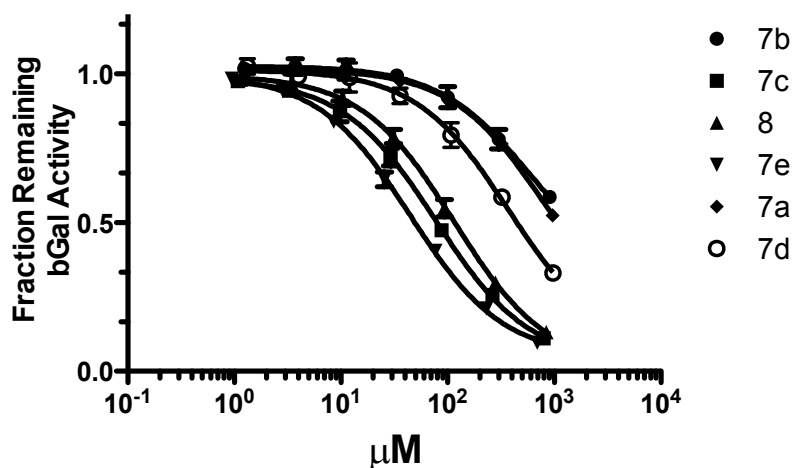

Supplement: Supplementary file 1 [file 3927547]
